1 **Title**

2 ***Myoparr*-associated and -independent multiple roles of heterogeneous nuclear**  
3 **ribonucleoprotein K during skeletal muscle cell differentiation**

4

5 **Authors**

6 Keisuke Hitachi<sup>1</sup>, Yuri Kiyofuji<sup>1</sup>, Masashi Nakatani<sup>2</sup>, and Kunihiro Tsuchida<sup>1,\*</sup>

7

8 **Affiliations**

9 <sup>1</sup>Division for Therapies against Intractable Diseases, Institute for Comprehensive  
10 Medical Science (ICMS), Fujita Health University, Toyoake, Japan, <sup>2</sup>Faculty of  
11 Rehabilitation and Care, Seijoh University, Tokai, Japan

12

13 \*Correspondence: [tsuchida@fujita-hu.ac.jp](mailto:tsuchida@fujita-hu.ac.jp)

14

15 **Abstract**

16 RNA-binding proteins (RBPs) regulate cell physiology via the formation of  
17 ribonucleic-protein complexes with coding and non-coding RNAs. RBPs have multiple  
18 functions in the same cells; however, the precise mechanism through which their  
19 pleiotropic functions are determined remains unknown. In this study, we revealed the  
20 multiple inhibitory functions of heterogeneous nuclear ribonucleoprotein K (hnRNPK)  
21 for myogenic differentiation. We first identified hnRNPK as a lncRNA *Myoparr* binding  
22 protein. Gain- and loss-of-function experiments showed that hnRNPK repressed the  
23 expression of *myogenin* at the transcriptional level. The hnRNPK-binding region of

24 *Myoparr* was required to repress *myogenin* expression. Moreover, hnRNPK repressed the  
25 expression of a set of genes coding for aminoacyl-tRNA synthetases in a *Myoparr*-  
26 independent manner. Mechanistically, hnRNPK regulated the eIF2 $\alpha$ /Atf4 pathway, one  
27 branch of the intrinsic pathways of the endoplasmic reticulum sensors, in differentiating  
28 myoblasts. Thus, our findings demonstrate that hnRNPK plays lncRNA-associated and -  
29 independent multiple roles during myogenic differentiation, indicating that the analysis  
30 of lncRNA-binding proteins will be useful for elucidating both the physiological  
31 functions of lncRNAs and the multiple functions of RBPs.

32

### 33 **Keywords**

34 transcriptional regulation, myogenic differentiation, RNA-binding protein, endoplasmic  
35 reticulum stress

36

37

## 38 Introduction

39 Long non-coding RNAs (lncRNAs), which are >200 nucleotides (nt) in length  
40 and which do not encode more than 100 amino acids, are emerging as important regulators  
41 in diverse biological processes, including transcription, splicing, RNA stability, and  
42 translation (Statello et al., 2021). LncRNAs are pervasively transcribed from the  
43 noncoding genomic DNA; cis-regulatory regions, including promoter and enhancer,  
44 introns, 3' untranslated regions, and repetitive sequences (Chakraborty et al., 2014).  
45 LncRNAs are also expressed from the antisense direction of the coding genomic DNA  
46 (Hon et al., 2017). Thus, most of the genomic regions have the potential to express  
47 lncRNAs. Thus far, more than 260,000 lncRNA genes are registered in the LncBook,  
48 which is a curated knowledge-based database for human lncRNAs (Ma et al., 2019). Since  
49 lncRNAs exert their molecular functions by interacting with proteins, mRNAs, or  
50 microRNAs (Hitachi and Tsuchida, 2020), their molecular functions differ widely,  
51 depending on the interacting partners.

52 As lncRNA-interacting factors, RNA-binding proteins (RBPs) are essential to  
53 determine the molecular function of each lncRNA (Statello et al., 2021). In the human  
54 genome, more than 1,500 genes encode RBPs (Gerstberger et al., 2014). RBPs consist of  
55 ribonucleoprotein complexes together with lncRNAs to regulate various biological  
56 aspects. For example, the association of Ddx5/Ddx17 with lncRNAs, such as *SRA*, *mrhl*,  
57 *MeXis*, or *Myoparr*, is required to activate the expression of downstream genes (Caretto  
58 et al., 2006; Hitachi et al., 2019; Kataruka et al., 2017; Sallam et al., 2018). RBPs,  
59 including NONO, SFPQ, FUS, and RBM14, associate with *Neat1*, which is a highly  
60 abundant lncRNA in mammals, to form a large membrane-less structure paraspeckle in  
61 the nucleus (Hirose et al., 2019). A ubiquitously expressed RBP, known as human antigen

62 R (HuR) associates with lncRNAs and regulates their stability; HuR increases the  
63 cytosolic *linc-MDI* levels in skeletal muscle cells (Legnini et al., 2014), whereas it  
64 promotes the decay of *lincRNA-p21* in HeLa cells (Yoon et al., 2012). Additionally, RBPs  
65 are also involved in RNA splicing, polyadenylation, RNA transport, and translation  
66 (Kelaini et al., 2021). The majority of RBPs are involved in multiple biological processes  
67 in concert with lncRNAs (Briata and Gherzi, 2020; Jonas et al., 2020; Nostrand et al.,  
68 2020), and mutations in genes coding for RBPs are associated with human genetic  
69 disorders (Gebauer et al., 2021).

70 Heterogeneous nuclear ribonucleoprotein K (hnRNPK), a member of the  
71 heterogeneous nuclear ribonucleoprotein family, has multiple roles, including chromatin  
72 remodeling, transcription, RNA splicing, and translation (Bomsztyk et al., 2004; Wang et  
73 al., 2020). hnRNPK acts together with *lincRNA-p21*, *EWSAT1*, and *lincRNA-OG*, to  
74 regulate the expression of downstream genes in mouse embryonic fibroblasts, Ewing  
75 sarcoma, and bone marrow-derived mesenchymal stem cells (Dimitrova et al., 2014;  
76 Howarth et al., 2014; Tang et al., 2018). However, the molecular function of hnRNPK in  
77 skeletal muscle cells has not been fully elucidated. LncRNA *Myoparr* is an essential  
78 regulator of skeletal muscle cell proliferation and differentiation (Hitachi et al., 2019).  
79 *Myoparr* shares the same promoter region with the *myogenin* gene and activates *myogenin*  
80 expression by promoting the interaction between Ddx17 and histone acetyltransferase  
81 PCAF (Hitachi et al., 2019). We previously identified hnRNPK as a candidate for  
82 *Myoparr*-associated protein in skeletal muscle cells (Hitachi et al., 2019), suggesting the  
83 unique functions of *Myoparr*-associated hnRNPK during myogenic differentiation. In the  
84 present study, we revealed the inhibitory role of hnRNPK as a *Myoparr*-associated protein  
85 in skeletal muscle cell differentiation. Moreover, by comparing the downstream genes

86 regulated by *Myoparr* and hnRNPk, we also found a *Myoparr*-independent role of  
87 hnRNPk during myogenic differentiation. Our findings reveal that hnRNPk plays  
88 *Myoparr*-associated and -independent multiple roles in skeletal muscle cell  
89 differentiation and will contribute to elucidating the complex roles of RBPs in cell  
90 differentiation.

91

## 92 **Materials and Methods**

### 93 **Cell cultures, siRNA transfection, and ISRIB treatment**

94 A mouse myoblast cell line, C2C12, was cultured in Dulbecco's modified Eagle  
95 medium (DMEM) supplemented with 10% fetal bovine serum at 37°C under 5% CO<sub>2</sub>.  
96 Myogenic differentiation was induced by replacing the medium with the differentiation  
97 medium, DMEM supplemented with 2% horse serum. C2C12 myoblasts were transfected  
98 with 50 nM of Stealth RNAi (Thermo Fisher Scientific, Waltham, MA, USA) using  
99 Lipofectamine 3000 (Thermo Fisher Scientific) according to the manufacturer's protocol.  
100 The following siRNAs were used: Stealth RNAi siRNA negative control (Negative  
101 Control, Med GC, Thermo Fisher Scientific), stealth RNAi for *Myoparr*, and stealth  
102 RNAi siRNAs specific for *hnRNPk* (MSS205172 and MSS205173, Thermo Fisher  
103 Scientific). The siRNA sequences are listed in Supplemental Table 1. At 24 h after siRNA  
104 transfection, myogenic differentiation was induced. At 24 h or 72 h after differentiation  
105 induction, cells were collected for the analysis of RNAs and proteins. For ISRIB  
106 treatment, the differentiation medium was added either with or without 1 μM ISRIB  
107 (Cayman Chemical Company, Ann Arbor, MI, USA).

108

### 109 **RNA isolation, reverse transcription reaction, and quantitative RT-PCR**

110 Total RNA was extracted from C2C12 cells using ISOGEN II reagent (Nippon  
111 Gene, Tokyo, Japan) according to the manufacturer's protocol. After DNase I (Thermo  
112 Fisher Scientific) treatment, total RNA was used for reverse transcription reaction using  
113 SuperScript III Reverse Transcriptase (Thermo Fisher Scientific) or ProtoScript II  
114 Reverse Transcriptase (New England Biolabs (NEB), Beverly, MA, USA) with random  
115 or oligo (dT) primers (Thermo Fisher Scientific). Quantitative real-time PCR was  
116 conducted using SYBR Premix Ex Taq (Takara Bio Inc., Shiga, Japan) and a Thermal  
117 Cycler Dice Real Time System TP800 (Takara Bio Inc.). The results were normalized to  
118 the *Rpl26* expression. The primers used are listed in Supplementary Table 1.

119

## 120 **Protein extraction and Western blotting**

121 Cells were lysed in RIPA buffer (50 mM Tris-HCl (pH 8.0), 150 mM NaCl,  
122 0.1% SDS, 1% Triton X-100, 0.5% sodium deoxycholate) containing protease inhibitors  
123 (1 mM phenylmethylsulfonyl fluoride, 1 µg/ml aprotinin, 4 µg/ml leupeptin) and  
124 phosphatase inhibitors (5 mM NaF, 5 mM β-glycerophosphate, 1 mM Na<sub>3</sub>VO<sub>4</sub>). The  
125 protein concentration was measured using a Pierce BCA Protein Assay Kit (Thermo  
126 Fischer Scientific). Equal amounts of protein were used for Western blotting. The  
127 following primary antibodies were used: myogenin antibody (F5D) (sc-12732, Santa  
128 Cruz Biotechnology, Dallas, TX, USA), MHC antibody (MF20, Developmental Studies  
129 Hybridoma Bank (DSHB)), Myod antibody (CE-011A, Cosmo Bio Co. Ltd., Tokyo,  
130 Japan), hnRNPK antibody (#4675, Cell Signaling Technology (CST), Beverly, MA,  
131 USA), hnRNPK antibody (F45P9C7, BioLegend, San Diego, CA, USA), TIAR antibody  
132 (#8509, CST), and Atf4 antibody (693901, BioLegend). The following HRP-linked  
133 secondary antibodies were used: anti-mouse IgG (#7076, CST), anti-rabbit IgG (#7074,

134 CST), and TrueBlot ULTRA anti-Ig HRP, Mouse (Rat) (18-8817-33, Rockland  
135 Immunochemicals Inc., Limerick, PA, USA). Can Get Signal Immunoreaction Enhancer  
136 Solution (Toyobo, Osaka, Japan) was used when necessary. The signal was detected with  
137 ImmunoStar LD reagent (FUJIFILM Wako, Osaka, Japan) using a cooled CCD camera  
138 system (Light-Capture, ATTO, Tokyo, Japan).

139

#### 140 **Immunofluorescence assay**

141 Immunofluorescence analyses of C2C12 cells were performed as previously  
142 described (Hitachi et al., 2019). Briefly, 24 h or 72 h after the induction of differentiation,  
143 cells were fixed with 4% PFA and permeabilized with 0.2% Triton X-100. After blocking  
144 with 5% FBS, cells were stained with an anti-myogenin antibody (F5D, DSHB) or with  
145 an anti-MHC antibody (MF20, DSHB). The following secondary antibodies were used:  
146 Goat anti-Mouse IgG (H+L) Highly Cross-Adsorbed Secondary Antibody, Alexa Fluor  
147 488 (Thermo Fisher Scientific). Nuclei were counterstained with DAPI (Dojindo,  
148 Kumamoto, Japan). A DMI4000B microscope with a DFC350FX CCD camera (Leica,  
149 Wetzlar, Germany) was used for visualization of signals. Images were analyzed using the  
150 Image J software program (ver. 1.53a).

151

#### 152 **Identification of *Myoparr*-binding proteins**

153 *Myoparr*-binding proteins were collected with the RiboTrap Kit (Medical &  
154 Biological Laboratories (MBL), Aichi, Japan) using BrU labeled RNAs, as described  
155 previously (Hitachi et al., 2019). BrU-labeled *Myoparr* and *EGFP* RNA were prepared  
156 using the Riboprobe System (Promega, Madison, WI, USA). Twenty-four hours after the  
157 induction of differentiation, nuclear extract was prepared from differentiating C2C12

158 myoblasts. The *Myoparr* or *EGFP* RNA (50 pmol) were mixed with the nuclear extract  
159 from differentiating C2C12 myoblasts for 2 h at 4°C. The RNA-protein complexes were  
160 collected by Protein G Plus Agarose (Thermo Fisher Scientific) conjugated to an anti-  
161 BrdU antibody, and proteins were eluted by adding BrdU. Purified proteins were detected  
162 by Western blotting using a specific antibody, as described above.

163

#### 164 **RNA immunoprecipitation and the RNA pull-down assay**

165 Immunoprecipitation of endogenous RNAs (*Myoparr*, *Xist*, or *Neat1*) was  
166 performed using the RIP-Assay Kit (MBL) using  $2 \times 10^7$  C2C12 cells 48 h after the  
167 induction of differentiation, as previously described (Hitachi et al., 2019). The following  
168 antibodies were used for RNA immunoprecipitation: normal rabbit IgG (#2729S, CST),  
169 anti-HNRNPK pAb (RN019P, MBL), or TIAR mAb (#8509, CST). After treatment with  
170 DNase I, immunoprecipitated RNAs was used for the reverse transcription reaction. The  
171 precipitation percentage (precipitated RNA vs. input RNA) was calculated by qRT-PCR  
172 using the primers listed in Supplementary Table 1.

173 An RNA pull-down assay was performed with a RiboTrap Kit. Various lengths  
174 of *Myoparr* were subcloned into a pGEM-Teasy vector (Promega). BrU-labeled *Myoparr*  
175 (10 pmol each) was bound to Protein G Plus Agarose conjugated to an anti-BrdU antibody  
176 and mixed with the *in vitro* transcribed/translated hnRNP protein. After several washing  
177 steps, the binding of hnRNP to *Myoparr* was analyzed by Western blotting using an  
178 hnRNP antibody as described above.

179

#### 180 **Luciferase reporter assay**

181 The upstream region of *myogenin* (-1650/+51) was PCR-amplified and cloned



182 into the pGL4.20 vector (Promega). The *hnRNPK*-expressing plasmid was a kind gift  
183 from Dr. H. Okano (Yano et al., 2005). Proliferating C2C12 cells were transfected with  
184 the *myogenin* promoter and *hnRNPK*-expressing plasmid using Lipofectamine 2000  
185 (Thermo Fisher Scientific). The total amount of DNA was kept constant by the addition  
186 of the pcDNA3 vector. Cells were collected at 24 h after the induction of differentiation  
187 and dissolved in Passive Lysis Buffer (Promega). The effect of hnRNPK on *myogenin*  
188 promoter was measured using a Lumat LB 9507 luminometer (Berthold Technologies,  
189 Bad Wildbad, Germany) with the Dual-Luciferase Reporter Assay System (Promega)  
190 according to the manufacturer's protocol. The pGL4.74 vector (Promega) was used as an  
191 internal control. The relative luciferase activity is shown as the firefly to Renilla luciferase  
192 ratio.

193 To reconstitute the complex chromatin structure and epigenetic regulation *in*  
194 *vitro* (Liu et al., 2001), the upstream regions of *myogenin* (-242/+51 and -1650/+51) were  
195 subcloned into the episomal luciferase vector, pREP4-luc, and the -242-Luc and -1650-  
196 Luc constructs were generated. To create the -1650 $\Delta$ ccawmcc-Luc construct, the  
197 upstream region (-971/-902) of *myogenin* was deleted from the -1650-Luc construct. The  
198 region containing the putative hnRNPK-binding motif ccawmcc was identified by  
199 RBPmap (Paz et al., 2014). The episomal luciferase vector, pREB7-Rluc, was used as an  
200 internal control for the luciferase assay. The pREP4-luc and pREP7-Rluc vectors were  
201 gifts from Dr. K. Zhao (Liu et al., 2001). Subconfluent C2C12 cells were transfected with  
202 the indicated episomal luciferase vectors using Lipofectamine 2000. After myogenic  
203 induction, cells were collected and used to measure the relative luciferase activity.

204

205 **Analysis of downstream genes regulated by *Myoparr* KD and *hnRNPK* KD**

206 Downstream genes regulated by *Myoparr* KD and *hnRNPK* KD were identified as  
207 described previously (Hitachi and Tsuchida, 2019) using our RNA-Seq raw data  
208 (accession No. DRA005527). Briefly, statistical analysis of differentially expressed genes  
209 by *Myoparr* KD and *hnRNPK* KD was performed using DESeq2 ver. 1.12.4 software  
210 (Love et al., 2014) with a Wald test (cut-offs: false discovery rate (adjusted  $p$ -value, padj)  
211  $< 0.05$  and log 2 fold change  $> 0.75$  or  $< -0.75$ ). A pathway analysis of significantly  
212 upregulated genes coding for cytosolic aminoacyl-tRNA synthetases was performed  
213 based on the KEGG (Kanehisa et al., 2020). A Gene Ontology (GO) analysis of  
214 differentially expressed genes was performed with DAVID ver. 6.8  
215 (<https://david.ncifcrf.gov/>). An enrichment analysis was performed using Metascape  
216 (Zhou et al., 2019).

217

## 218 **Statistical analysis**

219 Error bars represent standard deviation. Statistical analyses were performed  
220 using unpaired two-tailed Student's  $t$ -tests. For comparisons of more than 2 groups, a one-  
221 way ANOVA followed by Tukey's post hoc test was performed using Prism 9 (GraphPad  
222 Software, San Diego, CA, USA). Statistical significance is reported in the Figures and  
223 Figure legends.  $P$  values of  $< 0.05$  were considered statistically significant.

224

## 225 **Results**

### 226 **Identification of hnRNPK as a *Myoparr*-binding protein in skeletal muscle cells**

227 Our proteomics analysis identified both hnRNPK and TIAR as candidates for  
228 *Myoparr*-associated proteins (Hitachi et al., 2019). To reveal whether hnRNPK and TIAR  
229 are associated with the *Myoparr* function during myogenic differentiation, we first

230 examined the specific interaction of *Myoparr* with endogenous hnRNPk and TIAR. *In*  
231 *vitro* synthesized *Myoparr* was labeled with 5-bromouridine (BrU) and mixed with the  
232 nuclear extract from differentiating C2C12 myoblasts. After purification of *Myoparr* by  
233 immunoprecipitation with a BrdU antibody, specific binding between *Myoparr* and  
234 hnRNPk protein was confirmed by immunoblotting (Figure 1A). Since binding between  
235 *EGFP* mRNA and hnRNPk was not observed, *EGFP* mRNA was used as a negative  
236 control. Intracellular binding between endogenous *Myoparr* and hnRNPk was shown by  
237 RNA immunoprecipitation using an hnRNPk-specific antibody without a crosslinking  
238 (Figure 1B and C). This enrichment of *Myoparr* by hnRNPk was stronger than that of  
239 *Xist* or *Neat1*, both of which interact with hnRNPk in other cells (Chu et al., 2015;  
240 Kawaguchi et al., 2015). Although TIAR protein was retrieved by synthesized *Myoparr*,  
241 intracellular endogenous interaction between *Myoparr* and TIAR was not observed  
242 (Supplementary Figure 1A-C). These results suggested that hnRNPk has function  
243 associated with *Myoparr*-binding during skeletal muscle differentiation.

244

#### 245 **hnRNPk represses the expression of *myogenin* in differentiating myoblasts**

246 During myogenic differentiation, the expression of *Myoparr* gradually  
247 increases and is required to activate the expression of *myogenin* (Hitachi et al., 2019).  
248 Thus, we examined the changes in the expression of hnRNPk during C2C12 cell  
249 differentiation. Although the expression of *myogenin* was highly increased after  
250 myogenic induction, the expression of hnRNPk gradually decreased (Figure 2A),  
251 suggesting the regulatory role of hnRNPk in the expression of *myogenin*. We next  
252 knocked down *hnRNPk* using the small interfering RNAs (siRNAs) in differentiating  
253 C2C12 cells. An immunocytochemistry analysis of the *myogenin* expression after

254 *hnRNP*K knockdown (KD) by two distinct siRNAs did not show a sufficient increase in  
255 the ratio of myogenin-positive cells comparing to the control (Figure 2B). However, we  
256 observed that the number of cells with high intensity of myogenin signal was increased  
257 by *hnRNP*K KD (Figure 2B and C). In addition, western blotting analyses showed that  
258 *hnRNP*K KD was associated with a significant increase in the expression of myogenin  
259 (Figure 2D-F). These results indicated that although *hnRNP*K KD is not enough to induce  
260 the expression of myogenin in cells where the expression of myogenin is not intrinsically  
261 present, *hnRNP*K KD increases the expression of myogenin in cells with intrinsic  
262 myogenin expression.

263 We observed that the expression of *myogenin* was significantly increased by  
264 *hnRNP*K KD (Figure 2G and H). Although the differences were not statistically  
265 significant, the *Myoparr* expression levels also tended to be increased by *hnRNP*K KD  
266 (Figure 2I). From these results, we surmise that *hnRNP*K negatively regulates the  
267 expression of *myogenin* at the transcriptional level. The effect of *hnRNP*K on the  
268 transcription of *myogenin* was examined using the *myogenin*-promoter-driven luciferase  
269 assay. The overexpression of *hnRNP*K in differentiating C2C12 cells decreased the  
270 *myogenin* promoter activity (Figure 2J), indicating that *hnRNP*K negatively regulates the  
271 expression of *myogenin* via the *myogenin* promoter.

272

### 273 **The *hnRNP*K-binding region of *Myoparr* is required to repress *myogenin* expression**

274 The *hnRNP*K-binding region of *Myoparr* was determined by RNA pull-down  
275 experiments using the various forms of *Myoparr* (Figure 3A). Figure 3B showed that  
276 *hnRNP*K bound to the full-length sense-strand of *Myoparr* (#3 in Figure 3B), but not to  
277 the full-length antisense-strand of *Myoparr* (#4). Although deletion of the 5'-region (#5

278 and 6) or 3'-region (#2 and 7) of *Myoparr* did not affect binding to hnRNPk, the deletion  
279 of the 3'-half of *Myoparr* (#1) completely diminished the binding to hnRNPk (Figure  
280 3B). These results indicated that an approximately 300-nt region (613-952 nt) of *Myoparr*  
281 is indispensable for binding to hnRNPk. Searching the motif sequence of RBPs from the  
282 300-nt region revealed that there are 8 ccawmcc motifs, which are recognized by  
283 hnRNPk (Figure 3C). The deletion of the motifs (660-729 nt) from the full-length of  
284 *Myoparr* (#8) markedly weakened the binding to hnRNPk (Figure 3B). Thus, the  
285 ccawmcc motifs on *Myoparr* were shown to be required for binding to hnRNPk.

286 To clarify whether *Myoparr* is involved in regulating the expression of  
287 *myogenin* by hnRNPk, we examined the effect of the ccawmcc motif on the *myogenin*  
288 promoter activity. To imitate a chromatin structure and epigenetic regulation on the  
289 plasmid DNA (Liu et al., 2001), the upstream region of *myogenin* (-1649 to +52)  
290 including *Myoparr* was cloned into an episomal luciferase vector. In accordance with our  
291 previous findings (Hitachi et al., 2019), the *myogenin* promoter showed high activity in  
292 the presence of *Myoparr* (-1650-Luc) in comparison to the -242-Luc construct, which  
293 only contains the *myogenin* promoter region in differentiating myoblasts (Figure 3D).  
294 Intriguingly, the activity of the -1650-Luc construct was further enhanced by the deletion  
295 of a region of approximately 70 bp (1650 $\Delta$ ccawmcc-Luc), which corresponds to the 660-  
296 729 nt region on *Myoparr* (Figure 3D). These results indicate that the hnRNPk-binding  
297 region of *Myoparr* is required to repress the expression of *myogenin* during skeletal  
298 muscle differentiation.

299

300 **hnRNPk inhibits skeletal muscle differentiation but is required for normal myotube**  
301 **formation**

302           The inhibitory role of hnRNPK in the expression of *myogenin* possibly via the  
303   ccawmcc motif on *Myoparr* suggested that hnRNPK and *Myoparr* have common  
304   downstream genes. Our RNA-Seq analysis (Hitachi and Tsuchida, 2019) revealed that  
305   *hnRNPK* KD significantly increased the expression of 226 genes and significantly  
306   decreased the expression of 190 genes. We compared the downstream genes regulated by  
307   *hnRNPK* KD and *Myoparr* KD, and the comparative heatmap analysis showed that the  
308   genes regulated by *hnRNPK* KD showed the opposite direction to the *Myoparr* KD  
309   (Figure 4A). Twenty percent of genes (84/416) altered by *hnRNPK* KD overlapped with  
310   genes regulated by the *Myoparr* KD (Figure 4B and Supplementary Table 2). The  
311   intersection of these genes was 12.3-fold greater than that expected by chance ( $p =$   
312    $1.393037 \times 10^{-45}$ ). Although these 84 genes showed a low correlation coefficient  
313   ( $R=0.0758323$ ), we observed a negative correlation trend for one segment of them,  
314   including *myogenin*; the expression of 50 genes belonging to this segment was increased  
315   by *hnRNPK* KD and decreased by *Myoparr* KD (red frame in Figure 4C). These genes  
316   were enriched in sarcomere organization, myofibril assembly, and muscle contraction  
317   categories in GO terms (Figure 4D), indicating that hnRNPK inhibits myogenic  
318   differentiation and maturation.

319           In accordance with the results of the RNA-Seq analysis, we observed a  
320   significant increase in the expression of Myod, one of master regulators of myogenesis,  
321   and Myosin heavy chain (MHC), which is a later marker of myogenic differentiation and  
322   maturation, in the early stages of differentiation with *hnRNPK* KD (Figure 4E), indicating  
323   the *hnRNPK* KD causes premature differentiation of myoblasts. Although *hnRNPK* KD  
324   increased MHC expression in the late stages of differentiation (Figure 4F), *hnRNPK* KD  
325   did not affect the percentage of differentiated cells; this was shown by the fusion index

326 (Figure 4G) as well as the results from immunocytochemistry to detect myogenin (Figure  
327 2C). Instead, we observed the appearance of locally spherical myotubes following  
328 *hnRNPK* KD. These differed from the normal tube-shaped myotubes (Figure 4G). Thus,  
329 these results indicated that hnRNPK is required for normal myotube formation, possibly  
330 through the inhibitory effect on the premature differentiation of myoblasts at early stages  
331 of differentiation.

332

### 333 **hnRNPK represses the expression of aminoacyl-tRNA synthetases via the** 334 **eIF2 $\alpha$ /Atf4 pathway**

335 The Venn diagram in Figure 4B indicates that 332 genes regulated by *hnRNPK*  
336 KD were *Myoparr*-independent, suggesting the *Myoparr*-independent role of hnRNPK in  
337 differentiating myoblasts. We performed an enrichment analysis of genes regulated by  
338 *hnRNPK* KD and compared them with genes regulated by *Myoparr* KD. As reported  
339 previously (Hitachi et al., 2019), genes related to cell cycle and cell division were only  
340 enriched in genes regulated by *Myoparr* KD (Figure 5A). Skeletal muscle-associated  
341 genes were regulated by both *Myoparr* KD and *hnRNPK* KD (Figure 5A). Intriguingly,  
342 genes coding for aminoacyl-tRNA synthetases were regulated specifically by *hnRNPK*  
343 KD (red frame in Figure 5A). In mice, there are two-types of aminoacyl-tRNA  
344 synthetases: cytosolic and mitochondrial aminoacyl-tRNA synthetase. Our RNA-Seq  
345 analysis showed that *hnRNPK* KD significantly increased the expression of 10 genes  
346 coding for cytosolic aminoacyl-tRNA synthetases, whereas it had little effect on the  
347 expression of genes coding for mitochondrial aminoacyl-tRNA synthetases  
348 (Supplementary Figure 2). To confirm the RNA-Seq results, we randomly picked up 5  
349 genes coding for cytosolic aminoacyl-tRNA synthetases, and their expression changes by



350 *hnRNPK* KD were verified by qRT-PCR. *hnRNPK* KD using two distinct siRNAs  
351 significantly increased the expression of *Aars*, *Gars*, *Iars*, *Nars*, and *Sars* (Figure 5B-F).  
352 This regulation was not observed following *Myoparr* KD (Figure 5B-F), indicating that  
353 *hnRNPK* regulates the expression of these genes in a *Myoparr*-independent manner.

354 The expression of genes coding for almost all cytosolic aminoacyl-tRNA  
355 synthetases is activated by transcription factor Atf4 (Harding et al., 2003; Shan et al.,  
356 2016). Thus, we examined whether *hnRNPK* KD altered the expression of Atf4 in skeletal  
357 muscle cells. Although not statistically significant, the *Atf4* expression in differentiating  
358 myoblasts tended to be increased by *hnRNPK* KD (Figure 5G). *Myoparr* KD did not affect  
359 the expression of *Atf4* (Figure 5G). The effect of *hnRNPK* KD was more pronounced in  
360 the expression of Atf4 protein. The amount of Atf4 protein was highly increased by  
361 *hnRNPK* KD (Figure 5H). We further examined the expression changes of other ATF4  
362 target genes by *hnRNPK* KD in differentiating myoblasts. The expression levels of *Asns*  
363 and *Psat1*, which encode proteins related to amino acid synthesis, were significantly  
364 increased by *hnRNPK* KD (Supplementary Figure 3A and B). In addition, the expression  
365 levels of *Chop*, *Chac1*, and *Trb3*, pro-apoptosis genes, and *Gadd34*, an another ATF4  
366 target gene, also tended to be increased by *hnRNPK* KD (Supplementary Figure 3C-F).  
367 These results suggest that *hnRNPK* regulates the expression of genes associated with  
368 amino acid synthesis via the expression of Atf4.

369 Under the condition of endoplasmic reticulum (ER) stress, *Atf4* mRNA is  
370 translated more efficiently and contributes to the restoration of cell homeostasis via the  
371 regulation of cytosolic aminoacyl-tRNA synthetases (Afroze and Kumar, 2017). Thus, to  
372 reveal the molecular mechanism by which *hnRNPK* regulates the expression of Atf4, we  
373 finally focused on ER stress. ISRIB is an inhibitor of eIF2 $\alpha$ , which is a downstream



374 component of PERK signaling, one branch of the ER stress sensors. We investigated  
375 whether ISRIB treatment could suppress the increase in the expression of Atf4 induced  
376 by *hnRNPK* KD and found that ISRIB treatment completely rescued this *hnRNPK*-KD-  
377 induced increase (Figure 6A). Furthermore, ISRIB treatment abrogated the increased  
378 expression of Atf4 target genes, *Aars*, *Gars*, *Iars*, *Nars*, and *Sars* by *hnRNPK* KD (Figure  
379 6B-F and Supplementary Figure 4A-E). Thus, these results indicate that *Myoparr*-  
380 independent *hnRNPK* function is the regulation of the eIF2 $\alpha$ /Atf4 pathway during  
381 myogenic differentiation.

382

### 383 **Discussion**

384 RBP s have multiple molecular functions, including RNA splicing, transcription,  
385 translation, RNA stability, and the formation of the nuclear structure, to regulate cell  
386 proliferation, differentiation, development, and diseases (Kelaini et al., 2021). Although  
387 many RBPs have multiple functions in the cells (Briata and Gherzi, 2020; Jonas et al.,  
388 2020; Nostrand et al., 2020), it is still unclear how their pleiotropic functions are  
389 determined. In this study, we revealed novel multiple functions of *hnRNPK*, a member of  
390 the *hnRNP* family of RBPs, in skeletal muscle cells. By focusing on a lncRNA *Myoparr*-  
391 associated protein, we found that *hnRNPK* repressed the expression of *myogenin*, coding  
392 for one of the master regulators of muscle differentiation. Deletion of the *hnRNPK*-  
393 binding region of *Myoparr* activated the expression of *myogenin*. Moreover, our  
394 comparative analysis of the downstream genes of *hnRNPK* and *Myoparr* showed that the  
395 function of *hnRNPK* was pleiotropic. During myogenic differentiation, *hnRNPK*  
396 repressed the expression of a set of genes coding for cytosolic aminoacyl-tRNA  
397 synthetases via the eIF2 $\alpha$ /Atf4 pathway. Taken together, our study revealed multiple

398 inhibitory roles of hnRNPK in skeletal muscle cells: one was *Myoparr*-associated and the  
399 other was *Myoparr*-independent (Figure 7). Recently, Xu et al. reported that the  
400 deficiency of 36 amino acids in hnRNPK diminished C2C12 differentiation (Xu et al.,  
401 2018). However, our results provided strong evidence to support that hnRNPK has an  
402 inhibitory effect on muscle differentiation. In addition, we observed the appearance of  
403 locally spherical myotubes following *hnRNPK* KD. Considering the facts that  
404 dysregulated *Myod* expression leads to premature myogenic differentiation (Bröhl et al.,  
405 2012) and results in the formation of dysfunctional myofibers in mice (Schuster-Gossler  
406 et al., 2007), uncoordinated increases in *Myod*, myogenin, and MHC expression by  
407 *hnRNPK* KD may lead to abnormal shape of myotubes. In addition, the morphology of  
408 these myotubes closely resembles myotubes with myofibril-assembly defects (Wang et  
409 al., 2013), suggesting that hnRNPK may also be involved in the regulation of the  
410 myofibril assembly in myotubes. Therefore, despite its lncRNA-associated and -  
411 independent roles in the inhibition of myogenic differentiation, hnRNPK is apparently  
412 required for the formation of normal myotubes.

413           We observed that *hnRNPK* KD increased myogenin protein levels more  
414 robustly than *myogenin* mRNA. The peak expression of myogenin protein is detected 1-  
415 2 days after that of *myogenin* mRNA in both *in vitro* and *in vivo* myogenesis (Angelis et  
416 al., 1992; Figueroa et al., 2003), suggesting that a slight increase in *myogenin* mRNA by  
417 *hnRNPK* KD in the early stages of myogenic differentiation eventually led to a marked  
418 increase in myogenin protein. Therefore, the fine-tuning of the *myogenin* expression by  
419 hnRNPK at the early stages of differentiation may have a significant impact on the overall  
420 myogenic differentiation processes through the RNA-protein network. Intriguingly,  
421 despite the percentage of myogenin-positive cells was not changed, the expression of

422 myogenin protein was increased by *hnRNPK* KD. We observed that *hnRNPK* KD only  
423 increased the number of cells with high intensity of myogenin signal. These results  
424 suggest that *hnRNPK* can specifically repress the expression of *myogenin* in a subset of  
425 responding cells, rather than by simply turning off the expression of *myogenin* in every  
426 myoblast. Our experiments showed that *hnRNPK* repressed the expression of *myogenin*  
427 at the transcriptional level possibly via binding to the ccawmcc motif on *Myoparr*,  
428 suggesting that the existence of *Myoparr* would be necessary for *hnRNPK* to inhibit the  
429 expression of *myogenin*. Since *myogenin* and *Myoparr* share the same promoter region  
430 (Hitachi et al., 2019), *myogenin* and *Myoparr* are likely expressed in the same cells. Thus,  
431 the expression of *myogenin* would not be activated in the cells without the cell-intrinsic  
432 expression of *Myoparr*, even if *hnRNPK* is depleted in every myoblast. Further studies  
433 are required to investigate the more precise molecular mechanism by which *hnRNPK*  
434 regulates the expression of *myogenin* via binding to *Myoparr*.

435 ER stress is induced by several perturbations disrupting cell homeostasis,  
436 including protein misfolding, viral infection, and changes in intracellular calcium  
437 concentration (Hetz et al., 2015). The cells recognize those stresses with three branches  
438 of ER transmembrane sensors signaling, PERK, inositol-requiring protein 1 (IRE1), and  
439 ATF6 (Afroze and Kumar, 2017). During myogenic differentiation, ATF6 signaling was  
440 activated and led to apoptosis in myoblasts (Nakanishi et al., 2005). The increased  
441 phosphorylation of eIF2 $\alpha$ , a component of PERK signaling, was observed in myoblasts  
442 at the early stage after the induction of differentiation (Alter and Bengal, 2011). In  
443 addition, treatment with ER stress inducers enhanced apoptosis in myoblasts but led to  
444 efficient myogenic differentiation in the remaining surviving cells (Nakanishi et al., 2007).  
445 Recently, the deletion of PERK in satellite cells, which are adult muscle stem cells, was

446 shown to inhibit myogenic differentiation and led to impaired skeletal muscle  
447 regeneration in adult mice (Xiong et al., 2017), indicating that ER stress promotes  
448 myogenic differentiation. In this study, we showed that the *hnRNPK* KD in differentiating  
449 myoblasts increased the expression of Atf4 and this effect was diminished by treatment  
450 with ISRIB, a specific inhibitor of eIF2 $\alpha$ . The expression levels of a set of genes coding  
451 for cytosolic aminoacyl-tRNA synthetases, which are regulated by Atf4, were also  
452 increased by the *hnRNPK* KD, and were completely rescued after ISRIB treatment. The  
453 inhibitory effects of hnRNPK on Atf4 and cytosolic aminoacyl-tRNA synthetases were  
454 independent of *Myoparr*. Therefore, our findings suggest that hnRNPK fine-tunes the  
455 myogenic differentiation process by modulating ER stress via eIF2 $\alpha$ /Atf4 signaling in a  
456 lncRNA-independent manner. Since hnRNPK is involved in the translational efficiency  
457 (Lynch et al., 2005; Yano et al., 2005), a decrease in hnRNPK may induce the unfolded  
458 protein response via the translational machinery in myoblasts and alter eIF2 $\alpha$ /Atf4  
459 signaling.

460 In conclusion, hnRNPK plays multiple lncRNA-dependent and -independent  
461 roles in the inhibition of myogenic differentiation. Thus, the analysis of RBPs bound to  
462 lncRNAs will be useful for elucidating both the physiological functions of lncRNAs and  
463 the complex functions of RBPs in cell differentiation. Induced ER stress, including  
464 increased PERK signaling, was observed in skeletal muscle biopsy samples from  
465 myotonic dystrophy 1 patients and in mdx mice, a model of Duchenne muscular  
466 dystrophy (Hulmi et al., 2016; Ikezoe et al., 2007). Moreover, mutations in genes coding  
467 for aminoacyl-tRNA synthetases are implicated in human neuromuscular disorders  
468 (Benarroch et al., 2020), and autoantibodies against aminoacyl-tRNA synthetases are  
469 found in autoimmune disease (Targoff et al., 1993). Collectively, downstream genes of

470 hnRNP are strongly associated with neuromuscular and other disorders in humans,  
471 suggesting that targeting hnRNP to regulate the expression of these genes and signaling  
472 may become a new therapeutic strategy for human diseases.

473

#### 474 **Acknowledgments**

475 This work was supported in part by JSPS KAKENHI (19H03427 and 20K07315),  
476 Intramural Research Grants (2-5) for Neurological and Psychiatric Disorders of NCNP,  
477 and a Grant-in-Aid from the Mochida Memorial Foundation for Medical and  
478 Pharmaceutical Research.

479

#### 480 **Author Contributions**

481 K.H. and K.T. designed research; K.H. analyzed data; K.H., Y.K., and M.N. performed  
482 research; K.H. and K.T. wrote the paper. All authors revised, edited, and read the  
483 manuscript and approved the final manuscript.

484

#### 485 **Conflict of interest**

486 The authors declare no competing interests in association with the present study.

487

#### 488 **Figure Legends**

489 **Figure 1. Intracellular interaction between *Myoparr* and hnRNP in differentiating**  
490 **C2C12 cells.** (A) Synthesized *Myoparr* was mixed with C2C12 nuclear extract.  
491 Following purification of *Myoparr* by immunoprecipitation, the interaction between  
492 *Myoparr* and hnRNP was confirmed by immunoblotting using an hnRNP-specific  
493 antibody. *EGFP* mRNA was used for the control. Note that the smaller band would be a

494 splicing isoform of hnRNPK (Makeyev and Liebhaber, 2002). (B) RNA  
495 immunoprecipitation for *Myoparr*, *Xist*, and *Neat1* in differentiating C2C12 cells by an  
496 hnRNPK antibody. The interaction between endogenous *Myoparr* and hnRNPK was  
497 detected by qRT-PCR 2 days after the differentiation induction. Normal rabbit IgG was  
498 used for the control. The presence or absence of reverse transcription reaction is shown  
499 by (RT+) or (RT-), respectively. n = 4, mean ± SD. \*\*\* $p < 0.001$ . (C) hnRNPK protein  
500 from C2C12 cells purified by immunoprecipitation in (B) was confirmed by Western  
501 blotting.

502

503 **Figure 2. hnRNPK represses the expression of myogenin at the transcriptional level.**

504 (A) Western blots showing the hnRNPK and myogenin expression during C2C12  
505 differentiation. The tubulin expression served as an internal control. (B)  
506 Immunocytochemistry for myogenin 48 h after *hnRNPK* KD in C2C12 cells. Nuclei were  
507 counterstained with DAPI. Bar, 100 μm. The percentage of the myogenin-positive cells  
508 is shown as the percentage of the control. n = 4, mean ± SD. n.s., not significant. (C) The  
509 results of the cell count based on the signal intensity of immunocytochemistry for  
510 myogenin of (B). The red line indicates the median. Control; n=824, *hnRNPK* siRNA-1;  
511 n=859, *hnRNPK* siRNA-2; n=761. \*\*\* $p < 0.001$ . A Mann–Whitney nonparametric test  
512 was used for comparisons between each group. (D) Western blots showing increased  
513 myogenin expression in C2C12 cells 48 h after *hnRNPK* KD. Blots are representative of  
514 four repeats. (E-F) Relative quantification of hnRNPK (E) and myogenin (F) from (D). n  
515 = 4, mean ± SD. \*\*\* $p < 0.001$ , \*\* $p < 0.01$ . (G-I) Quantitative RT-PCR to detect the  
516 expression of *hnRNPK* (G), *myogenin* (H), and *Myoparr* (I) after *hnRNPK* knockdown. n  
517 = 3-4, mean ± SD. \*\*\* $p < 0.001$ , \* $p < 0.05$ , n.s., not significant. (J) Exogenous hnRNPK

518 decreased the promoter activity of *myogenin* in differentiating C2C12 cells.  $n = 3$ , mean  
519  $\pm$  SD.  $*p < 0.05$ .

520

521 **Figure 3. The hnRNPK region on *Myoparr* is required for repression of *myogenin***

522 **promoter activity.** (A) A schematic diagram of various lengths of *Myoparr* used for RNA

523 pull-down assays. (B) *In vitro* transcribed/translated hnRNPK protein was pulled down

524 by *Myoparr* and then detected by Western blotting using an hnRNPK-specific antibody.

525 Lane numbers are consistent with (A). The RNA lanes indicate various forms of *Myoparr*

526 used for RNA pull-down. (C) The results of an RBPmap analysis searching the motif of

527 hnRNPK. Colored letters correspond to the hnRNPK motif. The red frame indicates the

528 ccawmcc motifs within the region deleted in  $\Delta$ ccawmcc, #8 in (A). (D) The left panel

529 shows a schematic diagram of the constructs used for the luciferase assays. -242-Luc

530 contains the *myogenin* promoter region. -1650-Luc contains both the *myogenin* promoter

531 region and *Myoparr*. -1650 $\Delta$ ccawmcc-Luc contains the *myogenin* promoter region and

532 *Myoparr* without the ccawmcc motifs, corresponding to #8 in A. The right panel shows

533 the relative luciferase activities of indicated constructs in differentiating C2C12 cells.  $n$

534 = 4, mean  $\pm$  SD.  $***p < 0.001$ ,  $**p < 0.01$ ,  $*p < 0.05$ .

535

536 **Figure 4. hnRNPK inhibits myogenic differentiation but is required for normal**

537 **myotube formation.** (A) A heatmap diagram showing the increased or decreased

538 expression of genes regulated by *Myoparr* KD and *hnRNPK* KD. (B) The intersection of

539 genes regulated by *Myoparr* KD and *hnRNPK* KD shows a significant (Fisher's exact test)

540 overlap, which is 12.3 times larger than would be expected by chance alone. (C) Eighty-

541 four genes with expression levels that were significantly altered by both *Myoparr* KD and

542 *hnRNPK* KD showed an un-correlated pattern ( $R = 0.0758323$ , log 2 ratio scale). The red  
543 frame indicates the 50 genes for which the expression was decreased by *Myoparr* KD but  
544 increased by *hnRNPK* KD. (D) Enrichment GO categories of the 50 genes, corresponding  
545 to the red frame in (C). (E) Western blots showing increased MHC and Myod expression  
546 in C2C12 cells 48 h after *hnRNPK* KD. Blots are representative of three repeats. (F)  
547 Western blot showing the increased expression of MHC in C2C12 myotubes 96 h after  
548 *hnRNPK* KD. The tubulin expression served as an internal control. The blots shown are  
549 representative of three experiments. (G) Immunocytochemistry for MHC 96 h after  
550 *hnRNPK* KD. Nuclei were counterstained with DAPI. Bar, 100  $\mu\text{m}$ . The fusion index is  
551 shown as the percent of the control.  $n = 3$ , mean  $\pm$  SD. n.s., not significant.

552

553 **Figure 5. *hnRNPK* regulates the expression of genes coding for aminoacyl-tRNA**  
554 **synthetases in a *Myoparr*-independent manner.** (A) A Metascape analysis of genes  
555 regulated by *Myoparr* KD and *hnRNPK* KD. The red frame indicates the GO terms that  
556 were specifically enriched in *hnRNPK* KD. (B-G) qRT-PCR to detect the expression of  
557 *Aars* (B), *Gars* (C), *Iars* (D), *Nars* (E), *Sars* (F), *Atf4* (G) after either *Myoparr* KD or  
558 *hnRNPK* KD.  $n = 3$ , mean  $\pm$  SD.  $**p < 0.01$ ,  $*p < 0.05$ , n.s., not significant. (H) Western  
559 blot showing the increased expression of *Atf4* by *hnRNPK* KD. The tubulin expression  
560 served as an internal control. Blots are representative of three experiments.

561

562 **Figure 6. *hnRNPK* regulates the expression of genes coding for aminoacyl-tRNA**  
563 **synthetases via the eIF2 $\alpha$ /Atf4 pathway.** (A) Western blot showing the increased *Atf4*  
564 expression after *hnRNPK* KD, and ISRIB treatment suppressed the increase. DMSO is  
565 used as a control. The blots shown are representative of three experiments. (B-F) qRT-



566 PCR to detect the expression of *Aars* (B), *Gars* (C), *Iars* (D), *Nars* (E), *Sars* (F) after  
567 *hnRNPK* KD and ISRIB treatment.  $n = 3$ , mean  $\pm$  SD.  $**p < 0.01$ ,  $*p < 0.05$ , n.s., not  
568 significant.

569

570 **Figure 7. Multiple inhibitory roles of hnRNPK during myogenic differentiation.**

571 During myogenic differentiation, hnRNPK has two different downstream targets. One is  
572 *myogenin*, which codes for a regulator of myogenic differentiation. hnRNPK represses  
573 the *myogenin* expression by binding to the ccawmcc motifs on *Myoparr*. The other target  
574 is aminoacyl-tRNA synthetases. hnRNPK regulates the expression of aminoacyl-tRNA  
575 synthetases via the eIF2 $\alpha$ /Atf4 pathway. In hnRNPK-depleted cells, the hyperactivated  
576 expression of these genes may lead to the locally spherical formation of myotubes.

577

578 **Supplementary Table 1.** Primer and siRNA sequences.

579

580 **Supplementary Table 2.** The value (log<sub>2</sub> fold change) of the genes for which expression  
581 levels were increased or decreased by *Myoparr* KD and *hnRNPK* KD.

582

583 **Supplementary Figure 1. Detection of the interaction between *Myoparr* and TIAR**

584 **in differentiating C2C12 cells.** (A) The interaction between synthesized *Myoparr* and  
585 TIAR was detected by immunoblotting using a TIAR antibody. (B) qRT-PCR for the  
586 detection of *Myoparr* and *Xist* following RNA-immunoprecipitation using a TIAR  
587 antibody. The presence or absence of reverse transcription reaction is shown by (RT+) or  
588 (RT-), respectively. Bars indicate the average of two independent experiments, and circles  
589 and triangles represent the values of each experiment. (C) Purified TIAR protein from

590 C2C12 cells by immunoprecipitation using a TIAR antibody was confirmed by Western  
591 blotting.

592

593 **Supplementary Figure 2. RNA-Seq revealed the altered expression of a group of**  
594 **genes coding for cytosolic aminoacyl-tRNA synthetases by *hnRNPK* KD.** (A) The  
595 KEGG pathway diagram of cytosolic aminoacyl-tRNA biosynthesis. The gene names  
596 surrounded by the red frame indicate genes that are significantly upregulated by *hnRNPK*  
597 KD. (B-C) The results of the RNA-Seq analysis showing the altered expression of genes  
598 coding for cytosolic aminoacyl-tRNA synthetases (B) and mitochondrial aminoacyl-  
599 tRNA synthetases (C) by *hnRNPK* KD. Red and blue indicate genes that are significantly  
600 upregulated or downregulated, respectively, by *hnRNPK* KD.

601

602 **Supplementary Figure 3. The expression changes of ATF4 target genes by *hnRNPK***  
603 **KD in differentiating myoblasts.** (A-F) The results of qRT-PCR for detecting the  
604 expression of *Asns* (A), *Psat1* (B), *Gadd34* (C), *Chop* (D), *Chac1* (E), and *Trb3* (F)  
605 following *hnRNPK* KD. n = 3, mean ± SD. \*\*\* $p < 0.001$ , \* $p < 0.05$ .

606

607 **Supplementary Figure 4. *hnRNPK* regulates the expression of a group of genes**  
608 **coding for aminoacyl-tRNA synthetases via the eIF2 $\alpha$ /Atf4 pathway.** (A-E) The  
609 results of qRT-PCR for detecting the altered expression of *Aars* (A), *Gars* (B), *Iars* (C),  
610 *Nars* (D), and *Sars* (E) following *hnRNPK* KD (using a different siRNA from Figure 6)  
611 and ISRIB treatment. n = 3, mean ± SD. \* $p < 0.05$ .

612

613 **References**

- 614 **Afroze, D. and Kumar, A.** (2017). ER stress in skeletal muscle remodeling and  
615 myopathies. *Febs J* **286**, 379-398.
- 616 **Alter, J. and Bengal, E.** (2011). Stress-induced C/EBP Homology Protein (CHOP)  
617 represses MyoD transcription to delay myoblast differentiation. *Plos One* **6**, e29498.
- 618 **Angelis, M. G. C.-D., Lyons, G., Sonnino, C., Angelis, L. D., Vivarelli, E., Farmer, K.,**  
619 **Wright, W. E., Molinaro, M., Bouchè, M. and Buckingham, M.** (1992). MyoD,  
620 myogenin independent differentiation of primordial myoblasts in mouse somites. *J*  
621 *Cell Biology* **116**, 1243-1255.
- 622 **Benarroch, L., Bonne, G., Rivier, F. and Hamroun, D.** (2020). The 2021 version of the  
623 gene table of neuromuscular disorders (nuclear genome). *Neuromuscular Disord* **30**,  
624 1008-1048.
- 625 **Bomsztyk, K., Denisenko, O. and Ostrowski, J.** (2004). hnRNP K: One protein multiple  
626 processes. *Bioessays* **26**, 629-638.
- 627 **Briata, P. and Gherzi, R.** (2020). Long non-coding RNA-ribonucleoprotein networks in  
628 the post-transcriptional control of gene expression. *Non-coding Rna* **6**, 40.
- 629 **Bröhl, D., Vasyutina, E., Czajkowski, M. T., Griger, J., Rassek, C., Rahn, H.-P.,**  
630 **Purfürst, B., Wende, H. and Birchmeier, C.** (2012). Colonization of the satellite  
631 cell niche by skeletal muscle progenitor cells depends on Notch signals. *Dev Cell* **23**,  
632 469-481.
- 633 **Caretti, G., Schiltz, R. L., Dilworth, F. J., Padova, M. D., Zhao, P., Ogryzko, V.,**  
634 **Fuller-Pace, F. V., Hoffman, E. P., Tapscott, S. J. and Sartorelli, V.** (2006). The  
635 RNA helicases p68/p72 and the noncoding RNA SRA are coregulators of MyoD and  
636 skeletal muscle differentiation. *Dev Cell* **11**, 547-560.
- 637 **Chakraborty, S., Deb, A., Maji, R. K., Saha, S. and Ghosh, Z.** (2014). LncRBase: An  
638 enriched resource for lncRNA information. *Plos One* **9**, e108010.
- 639 **Chu, C., Zhang, Q. C., da Rocha, S. T., Flynn, R. A., Bharadwaj, M., Calabrese, J.**  
640 **M., Magnuson, T., Heard, E. and Chang, H. Y.** (2015). Systematic discovery of  
641 Xist RNA binding proteins. *Cell* **161**, 404-416.
- 642 **Dimitrova, N., Zamudio, J. R., Jong, R. M., Soukup, D., Resnick, R., Sarma, K.,**  
643 **Ward, A. J., Raj, A., Lee, J. T., Sharp, P. A., et al.** (2014). LincRNA-p21 activates  
644 p21 in cis to promote polycomb target gene expression and to enforce the G1/S  
645 checkpoint. *Mol Cell* **54**, 777-790.
- 646 **Figueroa, A., Cuadrado, A., Fan, J., Atasoy, U., Muscat, G. E., Muñoz-Canoves, P.,**

- 647 **Gorospe, M. and Muñoz, A.** (2003). Role of HuR in skeletal myogenesis through  
648 coordinate regulation of muscle differentiation genes. *Mol Cell Biol* **23**, 4991-5004.
- 649 **Gebauer, F., Schwarzl, T., Valcárcel, J. and Hentze, M. W.** (2021). RNA-binding  
650 proteins in human genetic disease. *Nat Rev Genet* **22**, 185-198.
- 651 **Gerstberger, S., Hafner, M. and Tuschl, T.** (2014). A census of human RNA-binding  
652 proteins. *Nat Rev Genet* **15**, 829-845.
- 653 **Harding, H. P., Zhang, Y., Zeng, H., Novoa, I., Lu, P. D., Calton, M., Sadri, N., Yun,  
654 C., Popko, B., Paules, R., et al.** (2003). An integrated stress response regulates amino  
655 acid metabolism and resistance to oxidative stress. *Mol Cell* **11**, 619-633.
- 656 **Hetz, C., Chevet, E. and Oakes, S. A.** (2015). Proteostasis control by the unfolded  
657 protein response. *Nat Cell Biol* **17**, 829-838.
- 658 **Hirose, T., Yamazaki, T. and Nakagawa, S.** (2019). Molecular anatomy of the  
659 architectural NEAT1 noncoding RNA: The domains, interactors, and biogenesis  
660 pathway required to build phase - separated nuclear paraspeckles. *Wiley Interdiscip  
661 Rev Rna* **10**, e1545.
- 662 **Hitachi, K. and Tsuchida, K.** (2019). Data describing the effects of depletion of Myoparr,  
663 myogenin, Ddx17, and hnRNPK in differentiating C2C12 cells. *Data Brief* **25**,  
664 104172.
- 665 **Hitachi, K. and Tsuchida, K.** (2020). The Chemical Biology of Long Noncoding RNAs.  
666 *Rna Technologies* 431-463.
- 667 **Hitachi, K., Nakatani, M., Takasaki, A., Ouchi, Y., Uezumi, A., Ageta, H., Inagaki,  
668 H., Kurahashi, H. and Tsuchida, K.** (2019). Myogenin promoter-associated  
669 lncRNA Myoparr is essential for myogenic differentiation. *Embo Rep* **20**, e47468.
- 670 **Hon, C.-C., Ramilowski, J. A., Harshbarger, J., Bertin, N., Rackham, O. J. L., Gough,  
671 J., Denisenko, E., Schmeier, S., Poulsen, T. M., Severin, J., et al.** (2017). An atlas  
672 of human long non-coding RNAs with accurate 5' ends. *Nature* **543**, 199-204.
- 673 **Howarth, M. M., Simpson, D., Ngok, S. P., Nieves, B., Chen, R., Siprashvili, Z., Vaka,  
674 D., Breese, M. R., Crompton, B. D., Alexe, G., et al.** (2014). Long noncoding RNA  
675 EWSAT1-mediated gene repression facilitates Ewing sarcoma oncogenesis. *J Clin  
676 Invest* **124**, 5275-5290.
- 677 **Hulmi, J. J., Hentilä, J., DeRuisseau, K. C., Oliveira, B. M., Papaioannou, K. G.,  
678 Autio, R., Kujala, U. M., Ritvos, O., Kainulainen, H., Korkmaz, A., et al.** (2016).  
679 Effects of muscular dystrophy, exercise and blocking activin receptor IIB ligands on

- 680 the unfolded protein response and oxidative stress. *Free Radical Bio Med* **99**, 308-  
681 322.
- 682 **Ikezoe, K., Nakamori, M., Furuya, H., Arahata, H., Kanemoto, S., Kimura, T.,**  
683 **Imaizumi, K., Takahashi, M. P., Sakoda, S., Fujii, N., et al.** (2007). Endoplasmic  
684 reticulum stress in myotonic dystrophy type 1 muscle. *Acta Neuropathol* **114**, 527-  
685 535.
- 686 **Jonas, K., Calin, G. A. and Pichler, M.** (2020). RNA-binding proteins as important  
687 regulators of long non-coding RNAs in cancer. *Int J Mol Sci* **21**, 2969.
- 688 **Kanehisa, M., Furumichi, M., Sato, Y., Ishiguro-Watanabe, M. and Tanabe, M.**  
689 (2020). KEGG: integrating viruses and cellular organisms. *Nucleic Acids Res* **49**,  
690 D545-D551.
- 691 **Kataruka, S., Akhade, V. S., Kayyar, B. and Rao, M. R. S.** (2017). Mrhl long  
692 noncoding RNA mediates meiotic commitment of mouse spermatogonial cells by  
693 regulating Sox8 expression. *Mol Cell Biol* **37**, e00632-16.
- 694 **Kawaguchi, T., Tanigawa, A., Naganuma, T., Ohkawa, Y., Souquere, S., Pierron, G.**  
695 **and Hirose, T.** (2015). SWI/SNF chromatin-remodeling complexes function in  
696 noncoding RNA-dependent assembly of nuclear bodies. *Proc National Acad Sci* **112**,  
697 4304-4309.
- 698 **Kelaini, S., Chan, C., Cornelius, V. A. and Margariti, A.** (2021). RNA-binding proteins  
699 hold key roles in function, dysfunction, and disease. *Biology* **10**, 366.
- 700 **Legnini, I., Morlando, M., Mangiavacchi, A., Fatica, A. and Bozzoni, I.** (2014). A  
701 feedforward regulatory loop between HuR and the long noncoding RNA linc-MD1  
702 controls early phases of myogenesis. *Mol Cell* **53**, 506-514.
- 703 **Liu, R., Liu, H., Chen, X., Kirby, M., Brown, P. O. and Zhao, K.** (2001). Regulation  
704 of CSF1 promoter by the SWI/SNF-like BAF complex. *Cell* **106**, 309-318.
- 705 **Love, M. I., Huber, W. and Anders, S.** (2014). Moderated estimation of fold change and  
706 dispersion for RNA-seq data with DESeq2. *Genome Biol* **15**, 550.
- 707 **Lynch, M., Chen, L., Ravitz, M. J., Mehtani, S., Korenblat, K., Pazin, M. J. and**  
708 **Schmidt, E. V.** (2005). hnRNP K binds a core polypyrimidine element in the  
709 eukaryotic translation initiation Factor 4E (eIF4E) promoter, and its regulation of  
710 eIF4E contributes to neoplastic transformation. *Mol Cell Biol* **25**, 6436-6453.
- 711 **Ma, L., Cao, J., Liu, L., Du, Q., Li, Z., Zou, D., Bajic, V. B. and Zhang, Z.** (2019).  
712 LncBook: a curated knowledgebase of human long non-coding RNAs. *Nucleic Acids*

- 713 *Res* **47**, D128-D134.
- 714 **Makeyev, A. V. and Liebhaber, S. A.** (2002). The poly(C)-binding proteins: A  
715 multiplicity of functions and a search for mechanisms. *Rna* **8**, 265-278.
- 716 **Nakanishi, K., Sudo, T. and Morishima, N.** (2005). Endoplasmic reticulum stress  
717 signaling transmitted by ATF6 mediates apoptosis during muscle development. *J Cell*  
718 *Biology* **169**, 555-560.
- 719 **Nakanishi, K., Dohmae, N. and Morishima, N.** (2007). Endoplasmic reticulum stress  
720 increases myofiber formation in vitro. *Faseb J* **21**, 2994-3003.
- 721 **Nostrand, E. L. V., Freese, P., Pratt, G. A., Wang, X., Wei, X., Xiao, R., Blue, S. M.,**  
722 **Chen, J.-Y., Cody, N. A. L., Dominguez, D., et al.** (2020). A large-scale binding and  
723 functional map of human RNA-binding proteins. *Nature* **583**, 711-719.
- 724 **Paz, I., Kosti, I., Ares, M., Cline, M. and Mandel-Gutfreund, Y.** (2014). RBPmap: a  
725 web server for mapping binding sites of RNA-binding proteins. *Nucleic Acids Res* **42**,  
726 W361-W367.
- 727 **Sallam, T., Jones, M., Thomas, B. J., Wu, X., Gilliland, T., Qian, K., Eskin, A., Casero,**  
728 **D., Zhang, Z., Sandhu, J., et al.** (2018). Transcriptional regulation of macrophage  
729 cholesterol efflux and atherogenesis by a long noncoding RNA. *Nat Med* **24**, 304-  
730 312.
- 731 **Schuster-Gossler, K., Cordes, R. and Gossler, A.** (2007). Premature myogenic  
732 differentiation and depletion of progenitor cells cause severe muscle hypotrophy in  
733 Delta1 mutants. *Proc National Acad Sci* **104**, 537-542.
- 734 **Shan, J., Zhang, F., Sharkey, J., Tang, T. A., Örd, T. and Kilberg, M. S.** (2016). The  
735 C/ebp-Atf response element (CARE) location reveals two distinct Atf4-dependent,  
736 elongation-mediated mechanisms for transcriptional induction of aminoacyl-tRNA  
737 synthetase genes in response to amino acid limitation. *Nucleic Acids Res* **44**, 9719-  
738 9732.
- 739 **Statello, L., Guo, C.-J., Chen, L.-L. and Huarte, M.** (2021). Gene regulation by long  
740 non-coding RNAs and its biological functions. *Nat Rev Mol Cell Bio* **22**, 96-118.
- 741 **Tang, S., Xie, Z., Wang, P., Li, J., Wang, S., Liu, W., Li, M., Wu, X., Su, H., Cen, S.,**  
742 **et al.** (2018). LncRNA-OG promotes the osteogenic differentiation of bone marrow-  
743 derived mesenchymal stem cells under the regulation of hnRNPK. *Stem Cells* **37**,  
744 270-283.
- 745 **Targoff, I. N., Trieu, E. P. and Miller, F. W.** (1993). Reaction of anti-OJ autoantibodies

- 746 with components of the multi-enzyme complex of aminoacyl-tRNA synthetases in  
747 addition to isoleucyl-tRNA synthetase. *J Clin Invest* **91**, 2556-2564.
- 748 **Wang, Z., Cui, J., Wong, W. M., Li, X., Xue, W., Lin, R., Wang, J., Wang, P., Tanner,**  
749 **J. A., Cheah, K. S. E., et al.** (2013). Kif5b controls the localization of myofibril  
750 components for their assembly and linkage to the myotendinous junctions.  
751 *Development* **140**, 617-626.
- 752 **Wang, Z., Qiu, H., He, J., Liu, L., Xue, W., Fox, A., Tickner, J. and Xu, J.** (2020). The  
753 emerging roles of hnRNPK. *J Cell Physiol* **235**, 1995-2008.
- 754 **Xiong, G., Hindi, S. M., Mann, A. K., Gallot, Y. S., Bohnert, K. R., Cavener, D. R.,**  
755 **Whittemore, S. R. and Kumar, A.** (2017). The PERK arm of the unfolded protein  
756 response regulates satellite cell-mediated skeletal muscle regeneration. *Elife* **6**,  
757 e22871.
- 758 **Xu, Y., Li, R., Zhang, K., Wu, W., Wang, S., Zhang, P. and Xu, H.** (2018). The  
759 multifunctional RNA-binding protein hnRNPK is critical for the proliferation and  
760 differentiation of myoblasts. *BMB Rep* **51**, 350-355.
- 761 **Yano, M., Okano, H. J. and Okano, H.** (2005). Involvement of Hu and heterogeneous  
762 nuclear ribonucleoprotein K in neuronal differentiation through p21 mRNA post-  
763 transcriptional regulation. *J Biol Chem* **280**, 12690-12699.
- 764 **Yoon, J.-H., Abdelmohsen, K., Srikantan, S., Yang, X., Martindale, J. L., De, S.,**  
765 **Huarte, M., Zhan, M., Becker, K. G. and Gorospe, M.** (2012). LincRNA-p21  
766 suppresses target mRNA translation. *Mol Cell* **47**, 648-655.
- 767 **Zhou, Y., Zhou, B., Pache, L., Chang, M., Khodabakhshi, A. H., Tanaseichuk, O.,**  
768 **Benner, C. and Chanda, S. K.** (2019). Metascape provides a biologist-oriented  
769 resource for the analysis of systems-level datasets. *Nat Commun* **10**, 1523.
- 770



# Figure 1

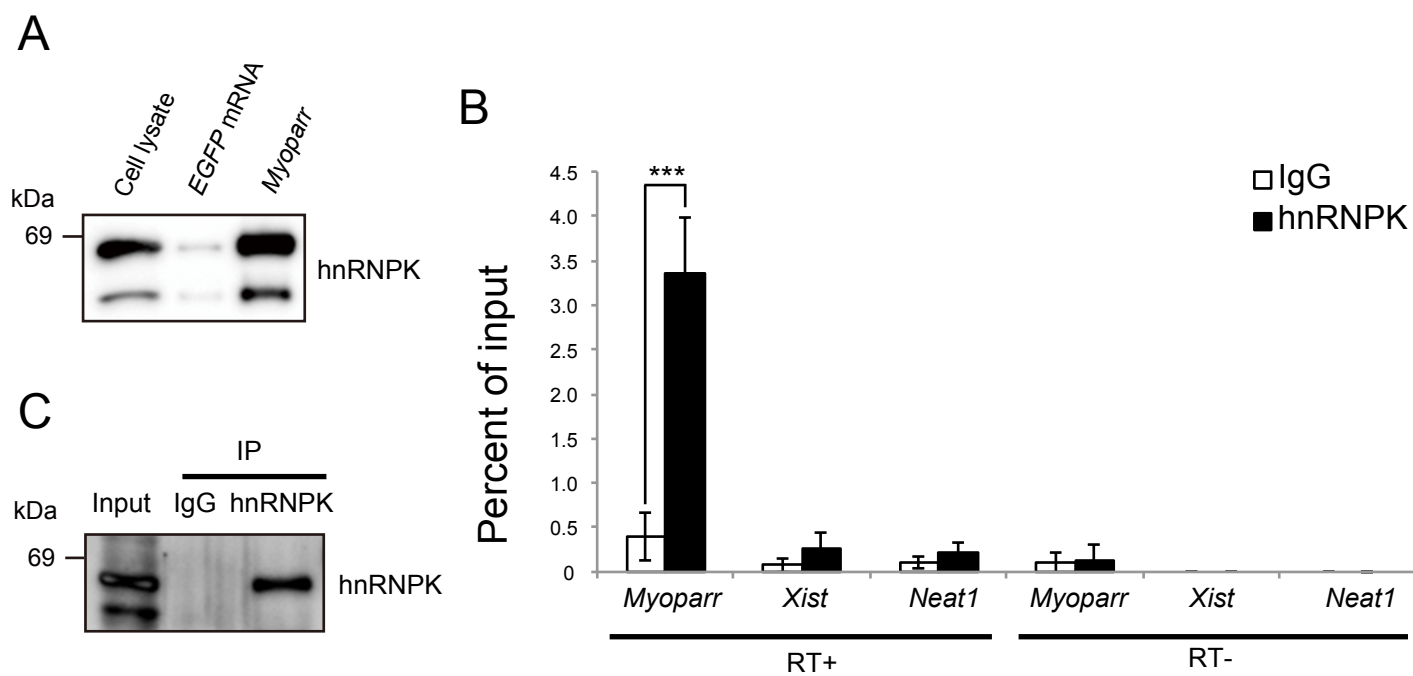



# Figure 2

bioRxiv preprint doi: <https://doi.org/10.1101/2021.07.09.451593>; this version posted September 16, 2021. The copyright holder for this preprint (which was not certified by peer review) is the author/funder, who has granted bioRxiv a license to display the preprint in perpetuity. It is made available under aCC-BY-NC-ND 4.0 International license.

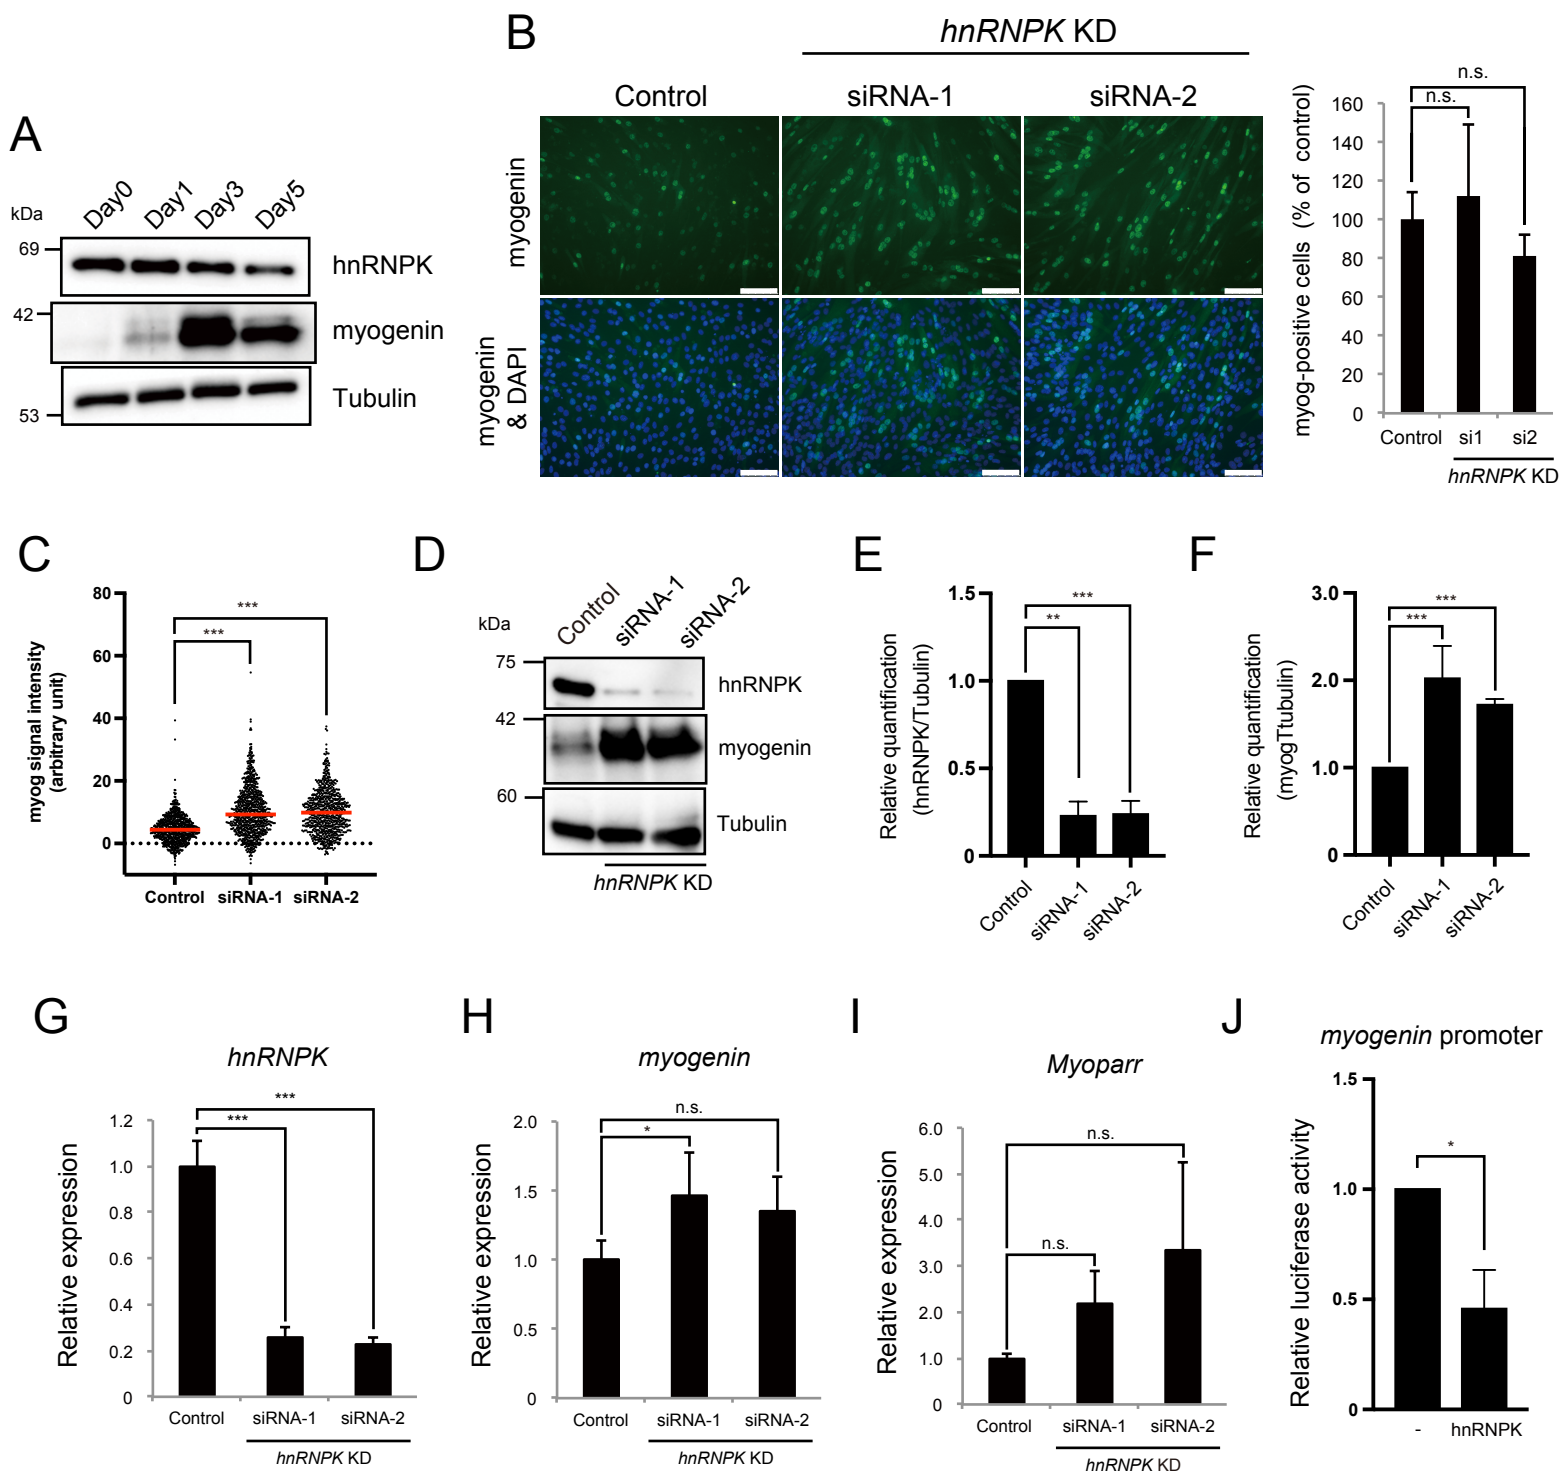

# Figure 3

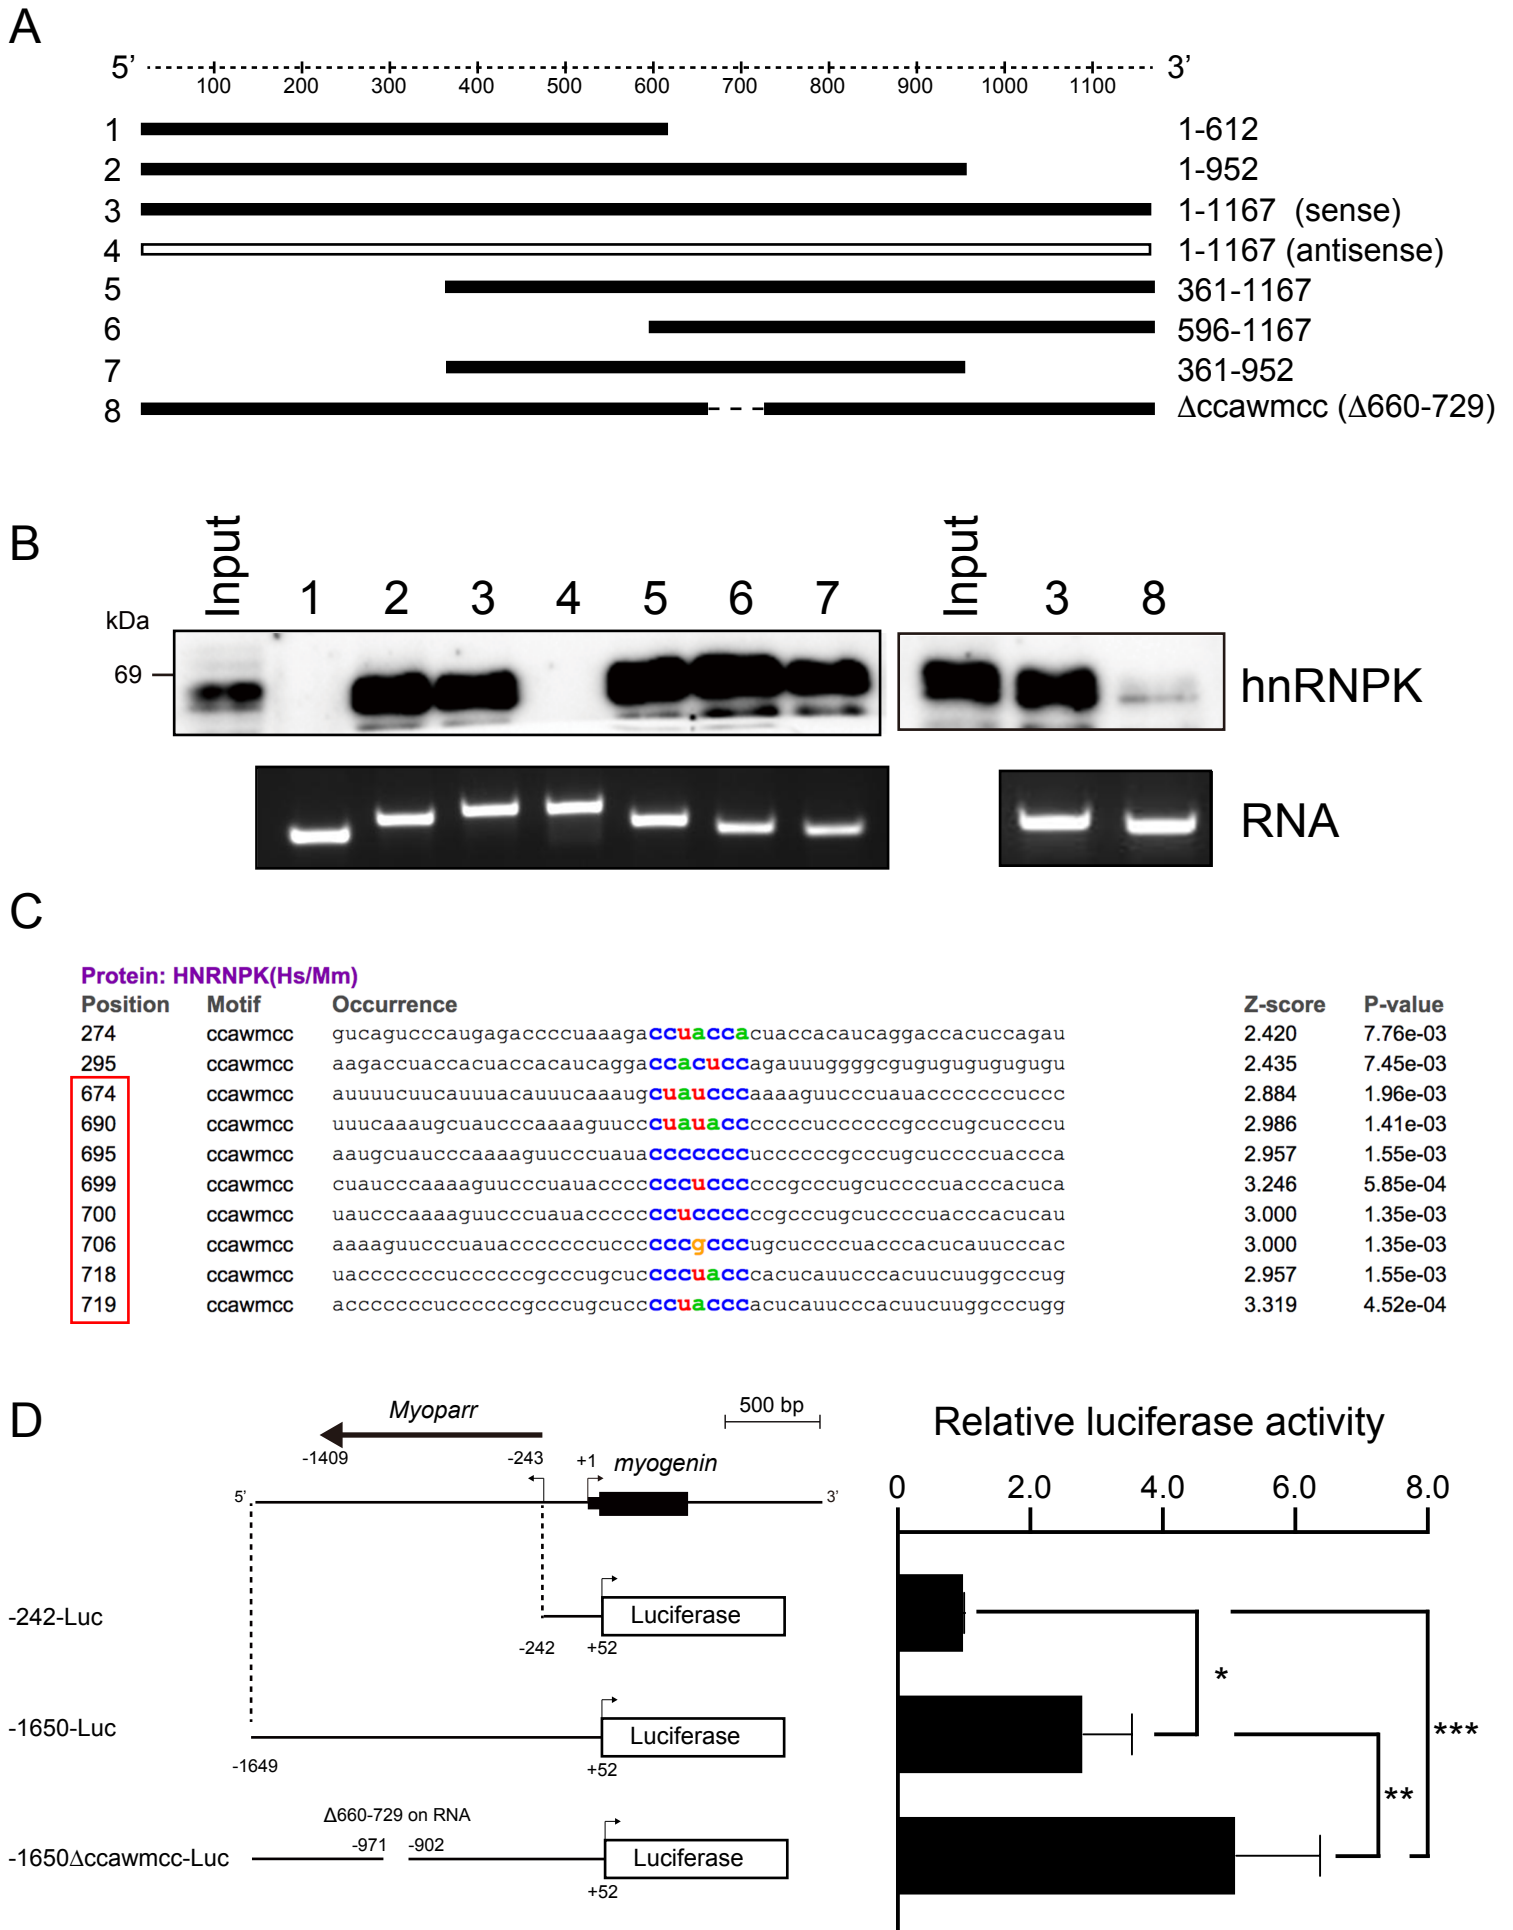

# Figure 4

bioRxiv preprint doi: <https://doi.org/10.1101/2021.07.09.451593>; this version posted September 16, 2021. The copyright holder for this preprint (which was not certified by peer review) is the author/funder, who has granted bioRxiv a license to display the preprint in perpetuity. It is made available under aCC-BY-NC-ND 4.0 International license.

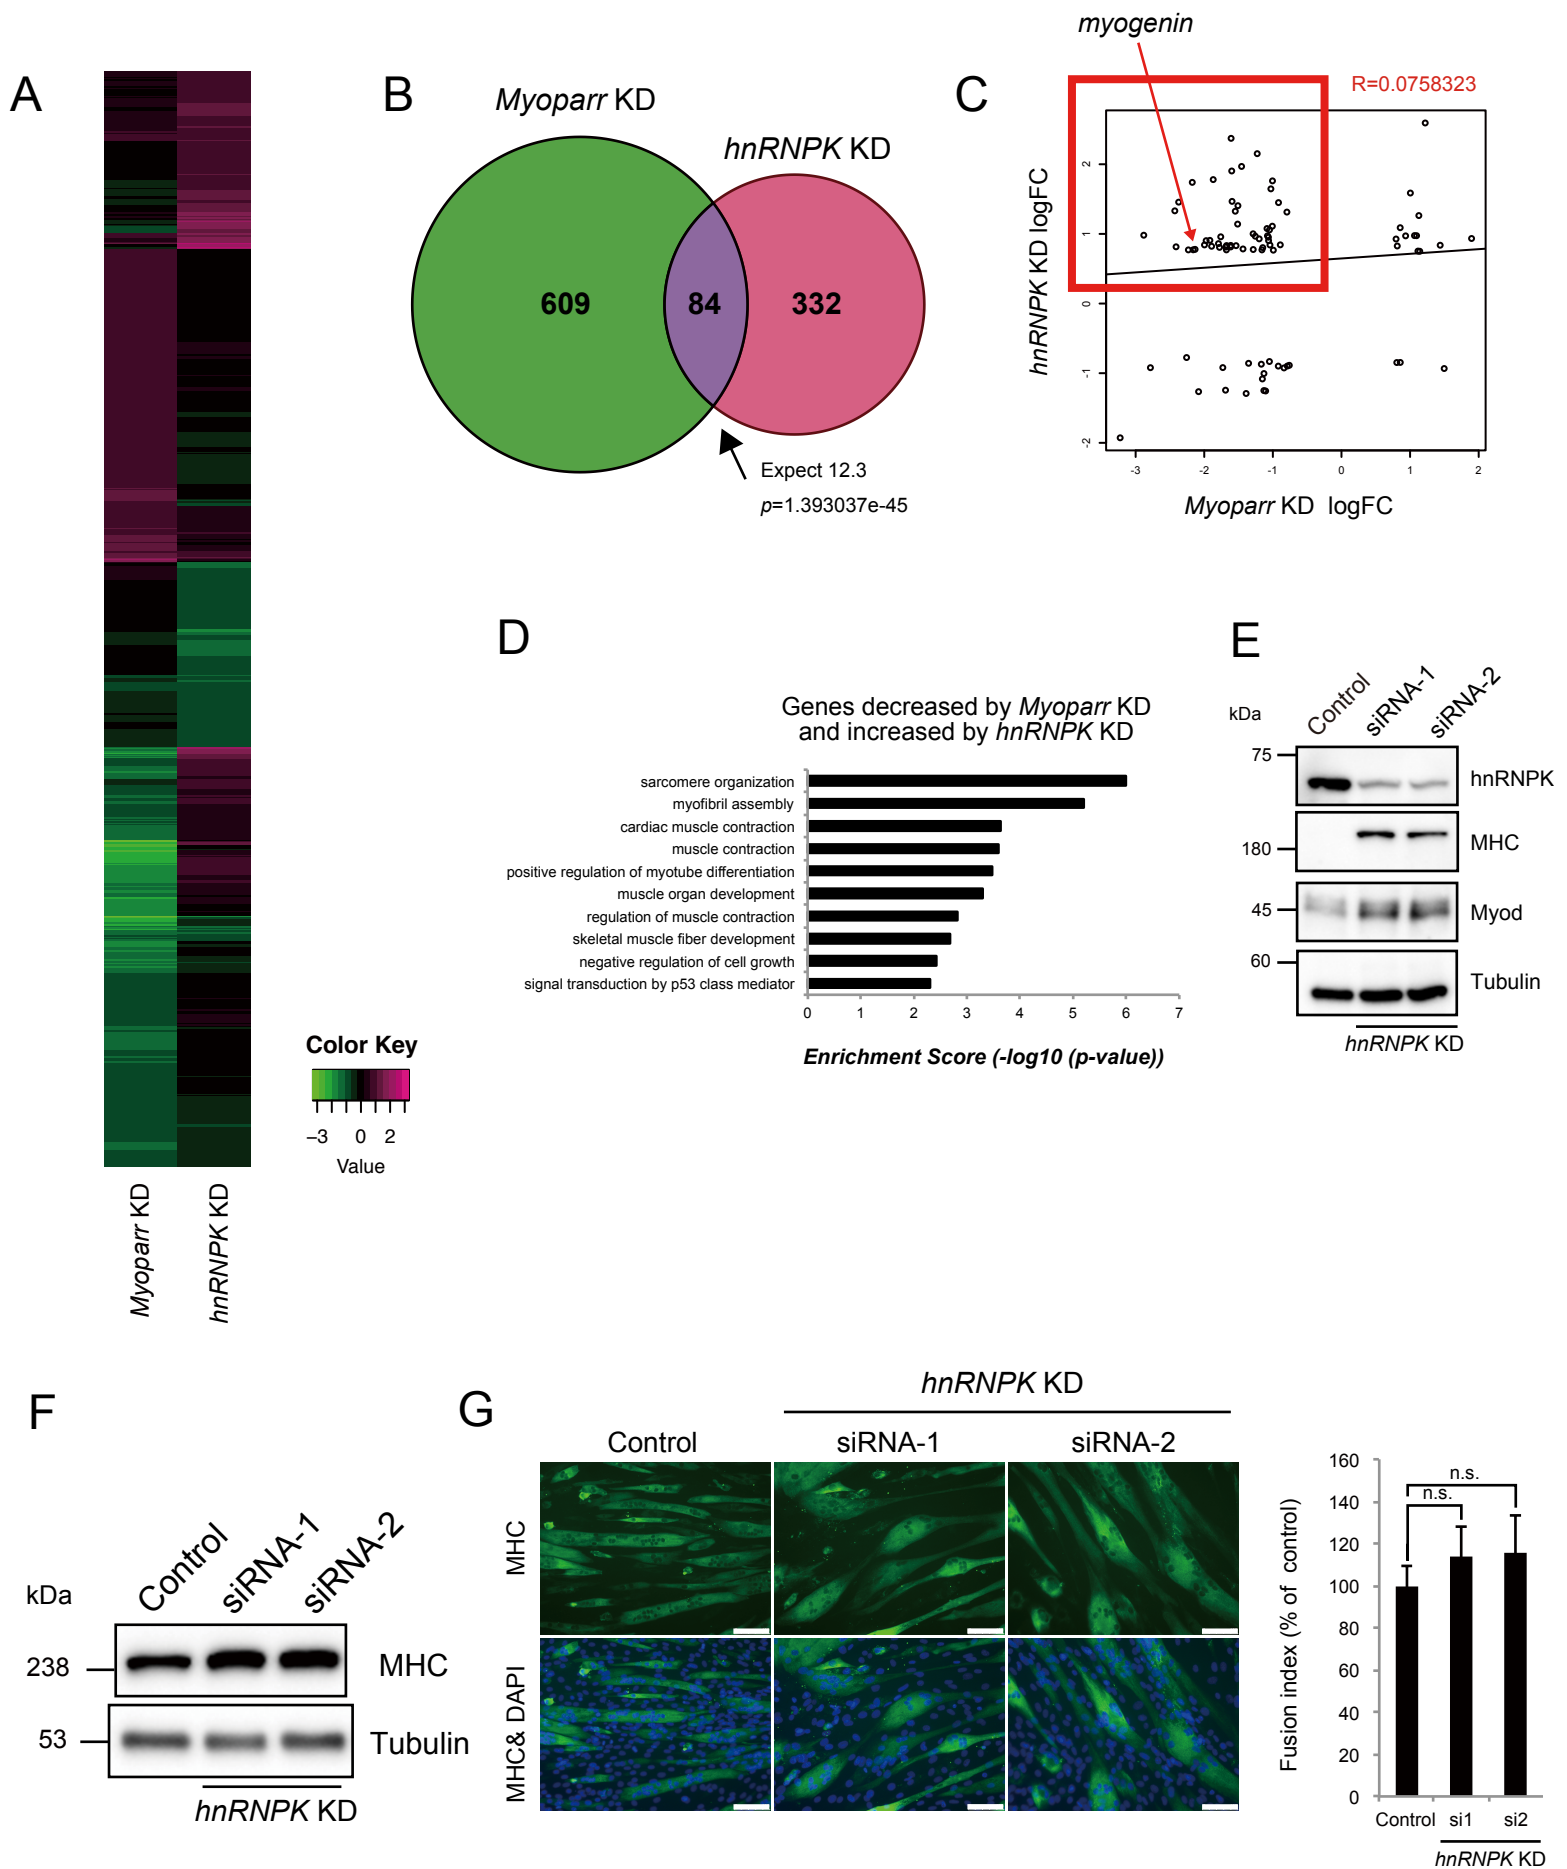

# Figure 5

bioRxiv preprint doi: <https://doi.org/10.1101/2021.07.09.451593>; this version posted September 16, 2021. The copyright holder for this preprint (which was not certified by peer review) is the author/funder, who has granted bioRxiv a license to display the preprint in perpetuity. It is made available under aCC-BY-NC-ND 4.0 International license.

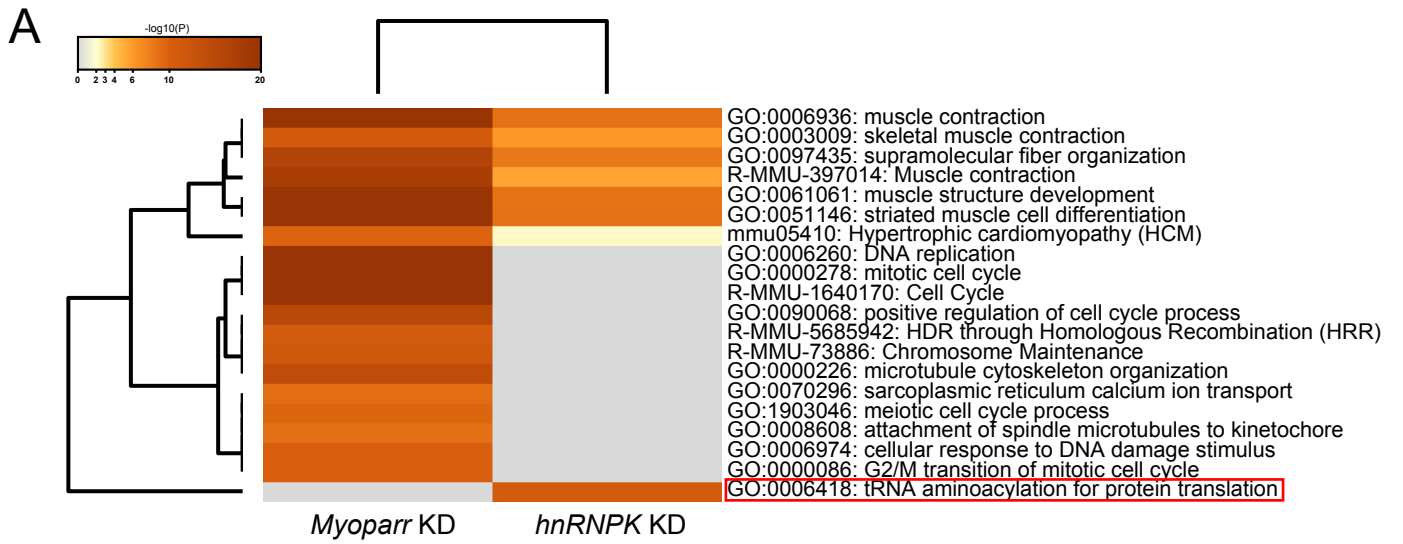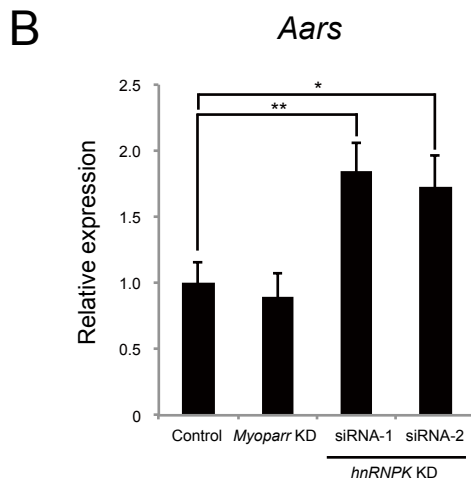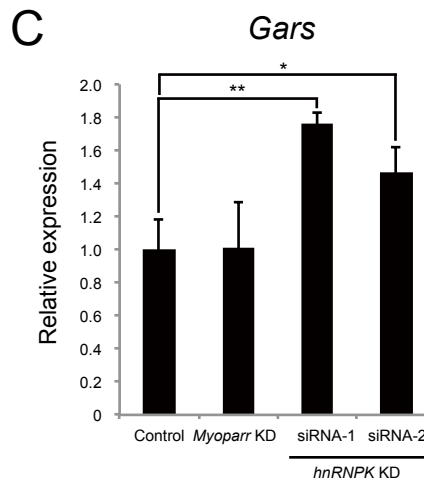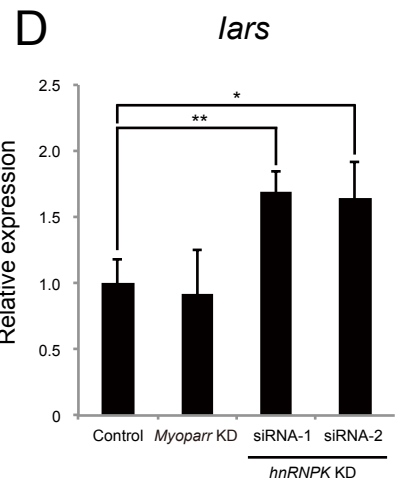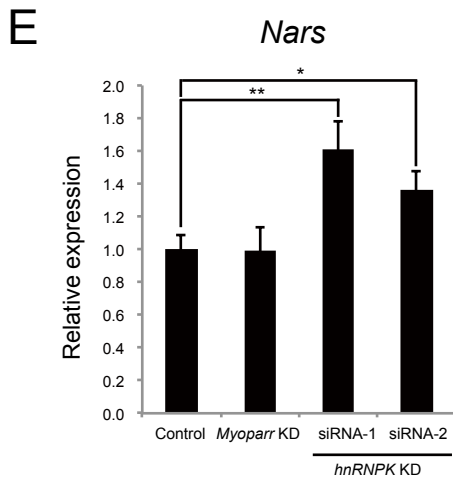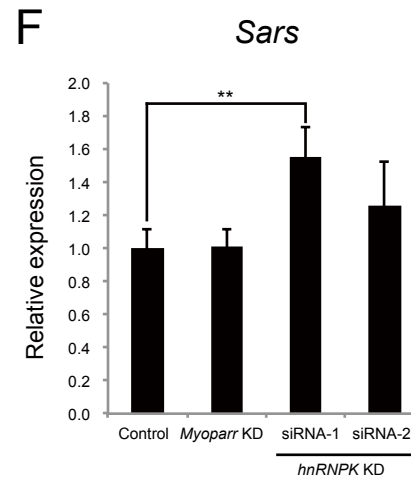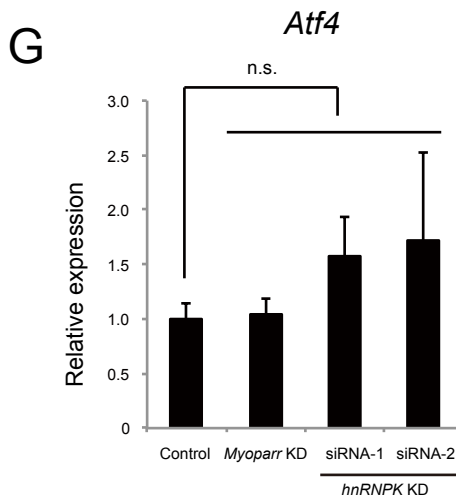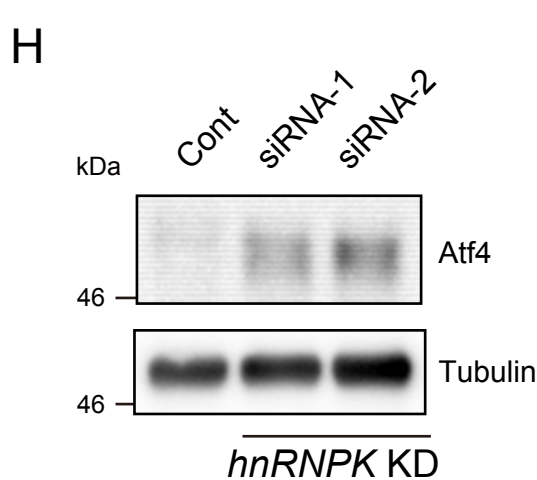

# Figure 6

bioRxiv preprint doi: <https://doi.org/10.1101/2021.07.09.451593>; this version posted September 16, 2021. The copyright holder for this preprint (which was not certified by peer review) is the author/funder, who has granted bioRxiv a license to display the preprint in perpetuity. It is made available under aCC-BY-NC-ND 4.0 International license.

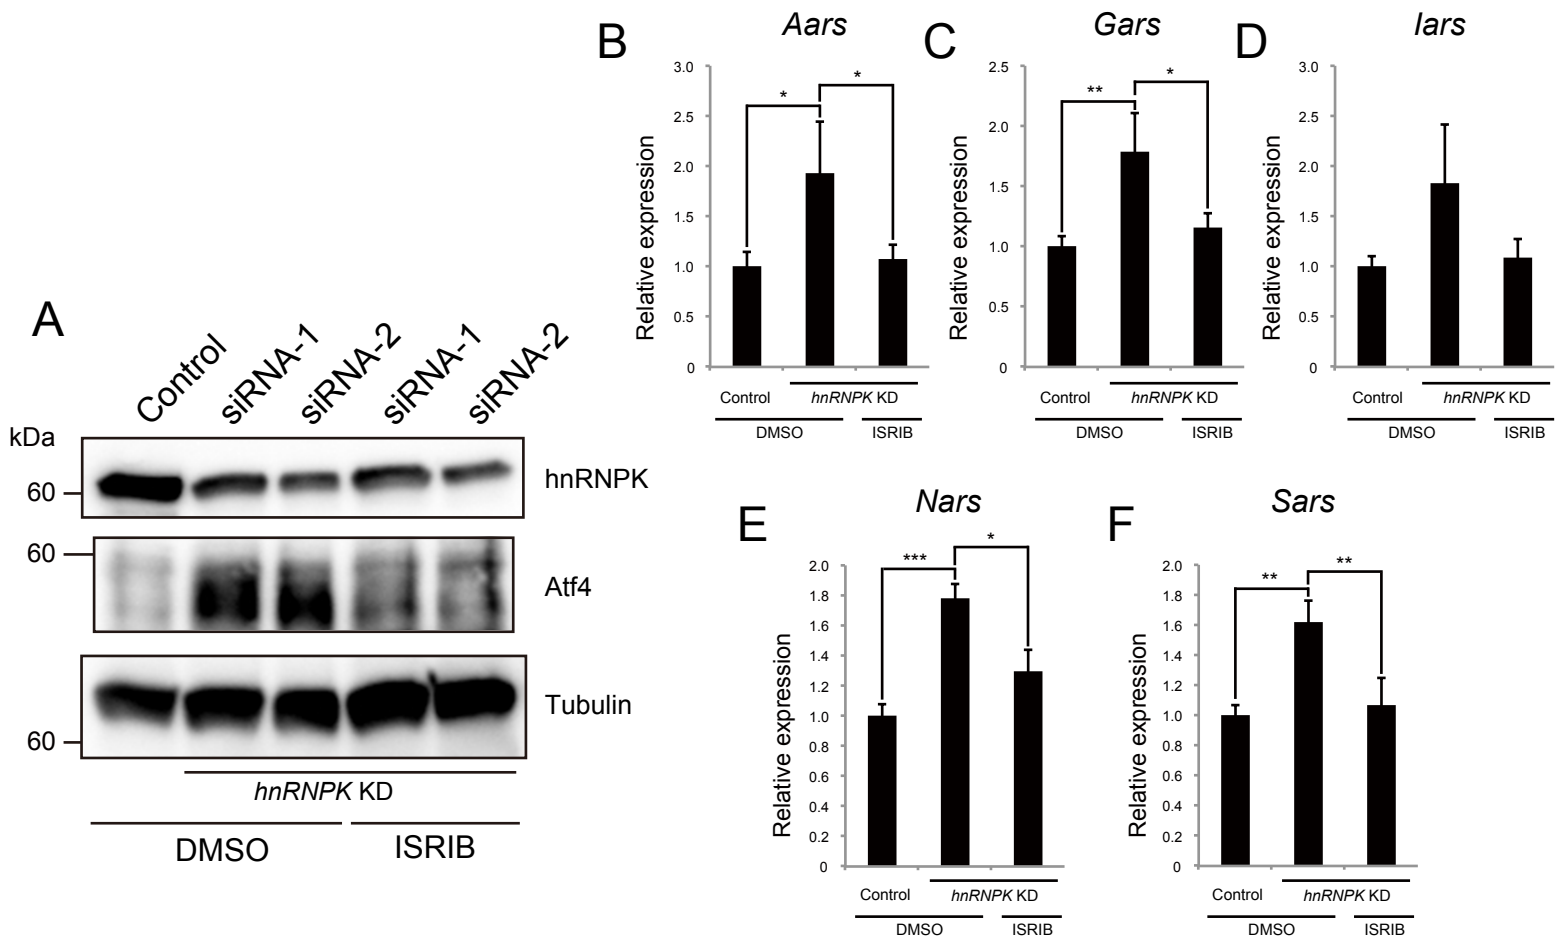

# Figure 7

bioRxiv preprint doi: <https://doi.org/10.1101/2021.07.09.451593>; this version posted September 16, 2021. The copyright holder for this preprint (which was not certified by peer review) is the author/funder, who has granted bioRxiv a license to display the preprint in perpetuity. It is made available under aCC-BY-NC-ND 4.0 International license.

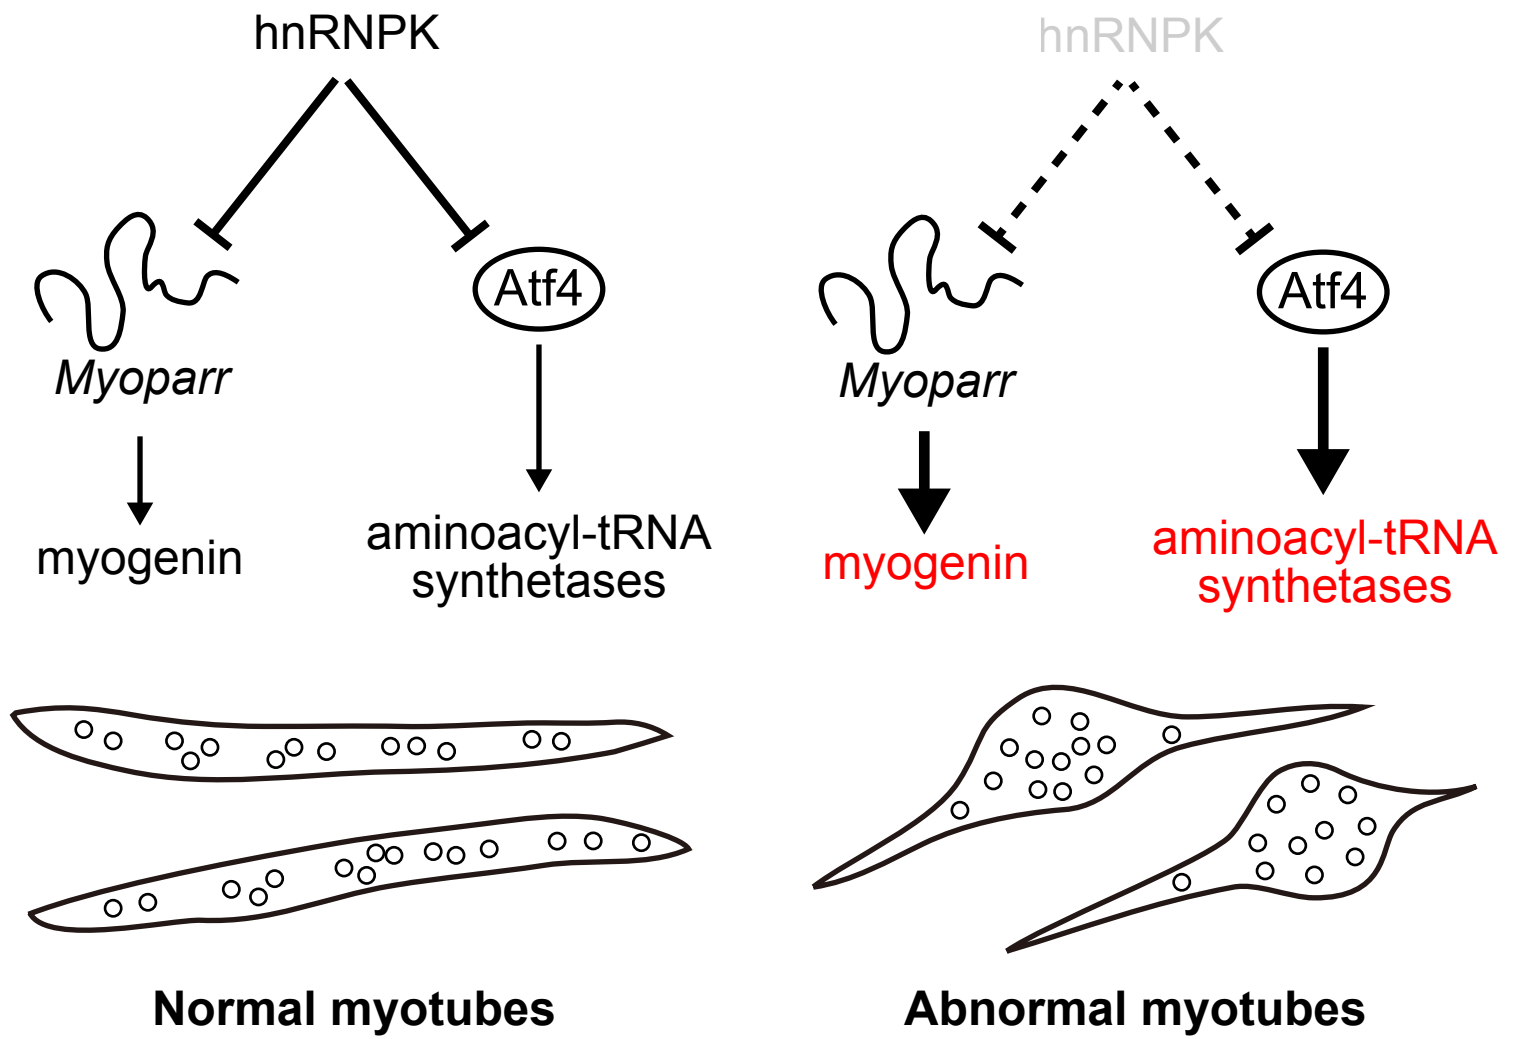

Source: https://www.biorxiv.org/content/10.1101/2021.07.09.451593v2.full.pdf
